# Supplementary material for: First one-pot organocatalytic synthesis of α-methylene-γ-lactones
Source: Royal Society of Chemistry journal article supplement (doi:10.1039/c2cc38659c), 2012-12-19
Supplement: c2cc38659c.pdf [file c2cc38659c.pdf]

## **SUPPORTING INFORMATION**

Xavier Companyo<sup>a</sup>, Andrea Mazzanti<sup>b</sup>, Albert Moyano<sup>a</sup>, Anna Janecka<sup>c</sup>,  
Ramon Rios<sup>ad,\*</sup>

## CONTENTS

|                                                                              |    |
|------------------------------------------------------------------------------|----|
| General methods .....                                                        | 3  |
| Starting materials .....                                                     | 4  |
| Lactones .....                                                               | 6  |
| Conformational analysis and absolute configuration determination of 4b ..... | 37 |

**General methods:**

Chemicals and solvents were either purchased *puriss p.A.* from commercial suppliers or purified by standard techniques. For thin-layer chromatography (TLC), silica gel plates Merck 60 F254 were used and compounds were visualized by irradiation with UV light and/or by treatment with a solution of phosphomolybdic acid (25 g),  $\text{Ce}(\text{SO}_4)_2 \cdot \text{H}_2\text{O}$  (10 g), conc.  $\text{H}_2\text{SO}_4$  (60 mL), and  $\text{H}_2\text{O}$  (940 mL) followed by heating or by treatment with a solution of *p*-anisaldehyde (23 mL), conc.  $\text{H}_2\text{SO}_4$  (35 mL), acetic acid (10 mL), and ethanol (900 mL) followed by heating. Flash chromatography was performed using silica gel Merck 60 (particle size 0.040-0.063 mm),  $^1\text{H}$  NMR,  $^{19}\text{F}$  NMR and  $^{13}\text{C}$  NMR spectra were recorded on Varian AS 400. Chemical shifts are given in ppm relative to tetramethylsilane (TMS) and the coupling constants  $J$  are given in Hz. The spectra were recorded in  $\text{CDCl}_3$  as solvent at room temperature. TMS served as internal standard ( $\delta = 0$  ppm) for  $^1\text{H}$  NMR,  $\text{CDCl}_3$  was used as internal standard ( $\delta = 77.0$  ppm) for  $^{13}\text{C}$  NMR and TFA was used as external standard for  $^{19}\text{F}$  NMR. High-resolution mass spectra were recorded on a Bruker MicrOTOF spectrometer.

## SYNTHESIS OF STARTING MATERIALS

**Procedure for the preparation of the MBH-alcohols:** To a round bottom flask charged with MeOH (0.75 eq.) was added the arylaldehyde (1 eq.) and methyl acrylate (1.2 eq.). To the solution was then added 1,4-diaza-bicyclo[2.2.2]octane (50 mol %) and the solution was stirred for 48-96 h. The crude reaction mixture directly was purified by flash column chromatography. (Hexane/EtOAc mixtures).

**Procedure for the preparation of MBH-carbonates:** To a solution of the Morita-Baylis-Hillman alcohol (1eq.) in  $\text{CH}_2\text{Cl}_2$  (0.5 M) was added  $(\text{Boc})_2\text{O}$  (1.05 eq.) and 4-dimethylaminopyridine (10 mol %). The solution was stirred until consumption of starting material and subsequently the solvent was removed by rotary evaporation. The reaction mixture was purified by flash column chromatography (Hexane/EtOAc mixtures).

### Diethyl 2-hydroxymalonate

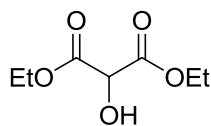

To a solution of diethyl 2-oxomalonate (5g, 28.7 mmol, 1 equiv.) in 30 mL of THF under Ar atmosphere, 29 mL of a solution of  $\text{PMe}_3$  in THF 1.0M (1.0 equiv.) were added drop wise and reacted 2h at room temperature. After total consumption of the starting material, the crude product was directly purified by flash column chromatography to afford the desired product as colourless oil in 32% yield

$^1\text{H}$  NMR (400 MHz,  $\text{CDCl}_3$ )  $\delta$  = 4.69 (bs, 1H), 4.36-4.22 (m, 4H), 3.42 (bs, 1H), 1.31 (t,  $J$  = 7.3Hz, 6H).

### Diethyl 2-(tert-butoxycarbonyloxy)malonate

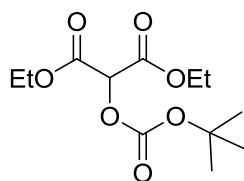

To a solution of Diethyl 2-hydroxymalonate (530 mg, 3.01 mmol, 1.0 equiv.) in 15 mL of  $\text{CH}_2\text{Cl}_2$ , 790 mg of  $(\text{Boc})_2\text{O}$  (1.2 equiv., 3.61 mmol) and 75mg of DMAP (0.2 equiv., 0.6 mmol) were added sequentially. After total consumption of the starting material (monitored by TLC) the crude product was directly purified by flash column chromatography (Hexane/EtOAc 3:1) to afford the desired product as colourless oil in 73% yield.

$^1\text{H}$  NMR (400 MHz,  $\text{CDCl}_3$ )  $\delta$  = 5.36 (s, 1H), 4.36–4.23 (m, 4H), 1.51 (s, 9H), 1.30 (t,  $J$ =7.3Hz, 6H)

Screening Conditions:

**Table 1:** Reaction screening<sup>a</sup>

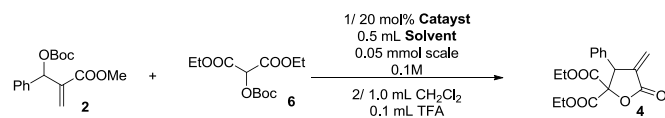

| Entry | Catalyst                         | Solvent                            | Conv. (14h) <sup>b</sup> | Crude ee <sup>c</sup> |
|-------|----------------------------------|------------------------------------|--------------------------|-----------------------|
| 1     | $\beta$ -ICPD (I)                | Toluene                            | 100%                     | -90%                  |
| 2     | Quinine (II)                     | Toluene                            | 36%                      | nd <sup>d</sup>       |
| 3     | Cinchonine (III)                 | Toluene                            | traces                   | nd                    |
| 4     | $(\text{DHQD})_2\text{AQN}$ (IV) | Toluene                            | 38%                      | Nd                    |
| 5     | $(\text{DHQD})_2\text{PHAL}$ (V) | Toluene                            | 79%                      | 90%                   |
| 6     | $\beta$ -ICPD (I)                | $\text{CF}_3\text{-C}_6\text{H}_5$ | 100%                     | -88%                  |
| 7     | $\beta$ -ICPD (I)                | $\text{CHCl}_3$                    | 100%                     | -82%                  |
| 8     | $\beta$ -ICPD (I)                | MeCN                               | 100%                     | -30%                  |
| 9     | $\beta$ -ICPD (I)                | TBME                               | Traces                   | Nd                    |
| 10    | $(\text{DHQD})_2\text{PHAL}$ (V) | $\text{CF}_3\text{-C}_6\text{H}_5$ | 48%                      | 86%                   |
| 11    | $(\text{DHQD})_2\text{PHAL}$ (V) | $\text{CHCl}_3$                    | 82%                      | 86%                   |
| 12    | $(\text{DHQD})_2\text{PHAL}$ (V) | MeCN                               | 85%                      | 80%                   |
| 13    | $(\text{DHQ})_2\text{PHAL}$ (VI) | Toluene                            | 36%                      | nd                    |

a) In a vial equipped with a magnetic stirring bar, the corresponding MBH carbonate (0.05 mmol, 2 equiv.), O-Boc-hydroxymalonate (0.025 mmol, 1 equiv.) and catalyst (0.005 mmol, 20 mol%) were added in 0.5 mL of toluene ( $C=0.1\text{M}$ ) and the reaction was stirred at room temperature for 14h. Next, the reaction crude was diluted with 1.0 mL of  $\text{CH}_2\text{Cl}_2$ , 0.1 mL of TFA was added in one portion and the mixture was stirred overnight. Then, 1.0 mL  $\text{H}_2\text{O}$  was added at the reaction crude and neutralized until  $\text{pH}=7$  with  $\text{Na}_2\text{CO}_3$ , extracted 3 times with EtOAc. b) Determined by  $^1\text{H}$  NMR analysis of the reaction crude. c) Enantiomeric excess determined by chiral HPLC; d) not determined

#### A. LACTONES

**General procedure for the synthesis of  $\alpha$ -methylenelactones from O-Boc Hydroximalonate:** In a vial equipped with a magnetic stirring bar, the corresponding MBH carbonate (0.2 mmol, 2 equiv.), O-Boc-hydroximalonate (0.1 mmol, 1 equiv.) and catalyst (0.02 mmol, 20 mol%) were added in 1.0 mL of toluene (C=0.1M) and the reaction was stirred at room temperature over 1-5 days. After consumption of starting material (monitored by  $^1\text{H}$ -NMR) the reaction crude was diluted with 1.0 mL of  $\text{CH}_2\text{Cl}_2$ , 0.1 mL of TFA was added in one portion and the mixture was stirred overnight. Then, 1.0 mL  $\text{H}_2\text{O}$  was added at the reaction crude and neutralized until  $\text{pH}=7$  with  $\text{Na}_2\text{CO}_3$ , extracted 3 times with EtOAc. The combined organic layers were dried with  $\text{MgSO}_4$  and the organic solvent eliminated to afford the crude product that was purified by flash column chromatography to afford the desired  $\alpha$ -methylene-lactone.

#### Diethyl 2-(2-(methoxycarbonyl)-1-(4-methoxyphenyl)allyloxy)malonate

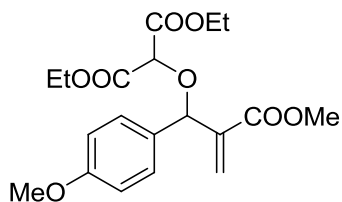

$^1\text{H}$  NMR (400 MHz,  $\text{CDCl}_3$ )  $\delta$  7.28 (d,  $J=8.7\text{Hz}$ , 2H), 6.84 (d,  $J=8.8\text{Hz}$ , 2H), 6.40 (s, 1H), 6.19 (s, 1H), 5.41 (s, 1H), 4.43 (s, 1H), 4.34-4.23 (m, 2H), 4.21-4.13 (m, 2H), 3.78 (s, 3H), 3.66 (s, 3H), 1.30 (t,  $J=7.3\text{Hz}$ , 3H), 1.22 (t,  $J=7.2\text{Hz}$ , 3H).

$^{13}\text{C}$  NMR (100 MHz,  $\text{CDCl}_3$ )  $\delta$  168.4, 166.4, 166.4, 165.8, 159.7, 139.8, 129.5, 129.4, 125.4, 113.8, 78.9, 71.5, 61.9, 61.8, 55.2, 14.0, 51.8, 13.9.

HRMS (ESI) calcd. for  $\text{C}_{19}\text{H}_{25}\text{O}_8$  ( $\text{M}+\text{H}$ ) $^+$  381.1544, found 381.1547.

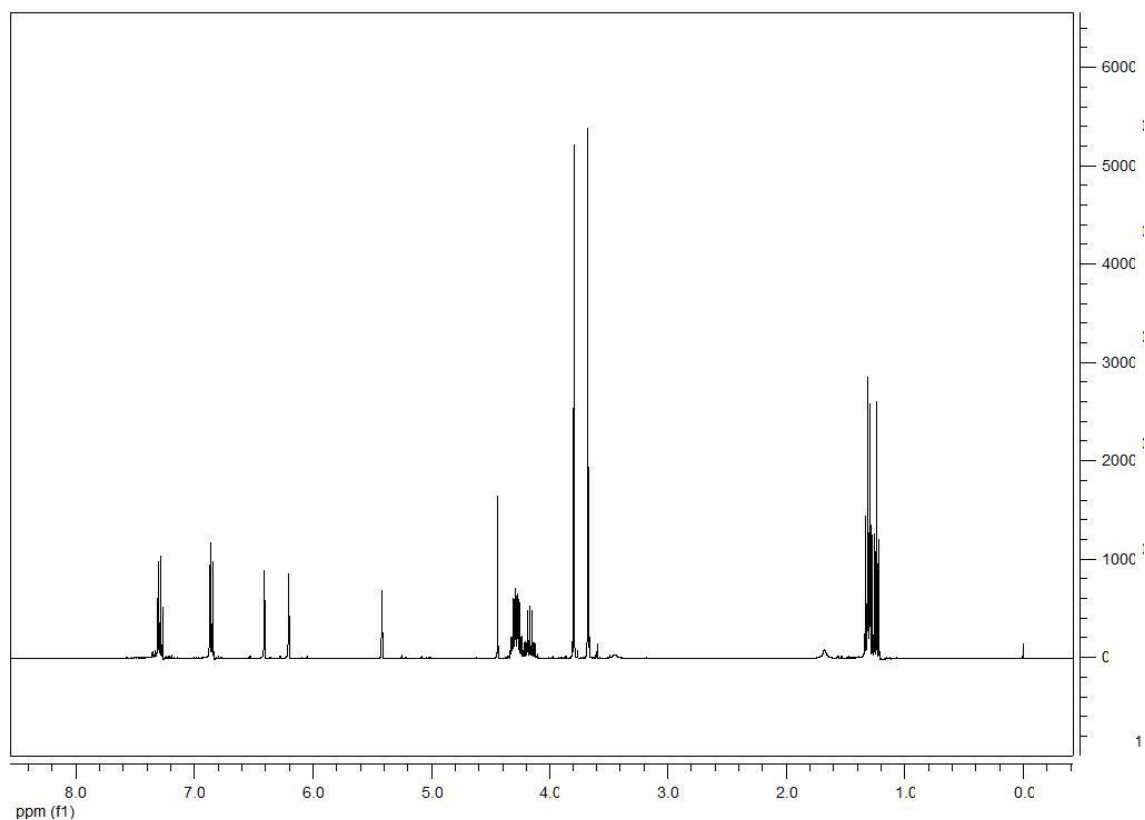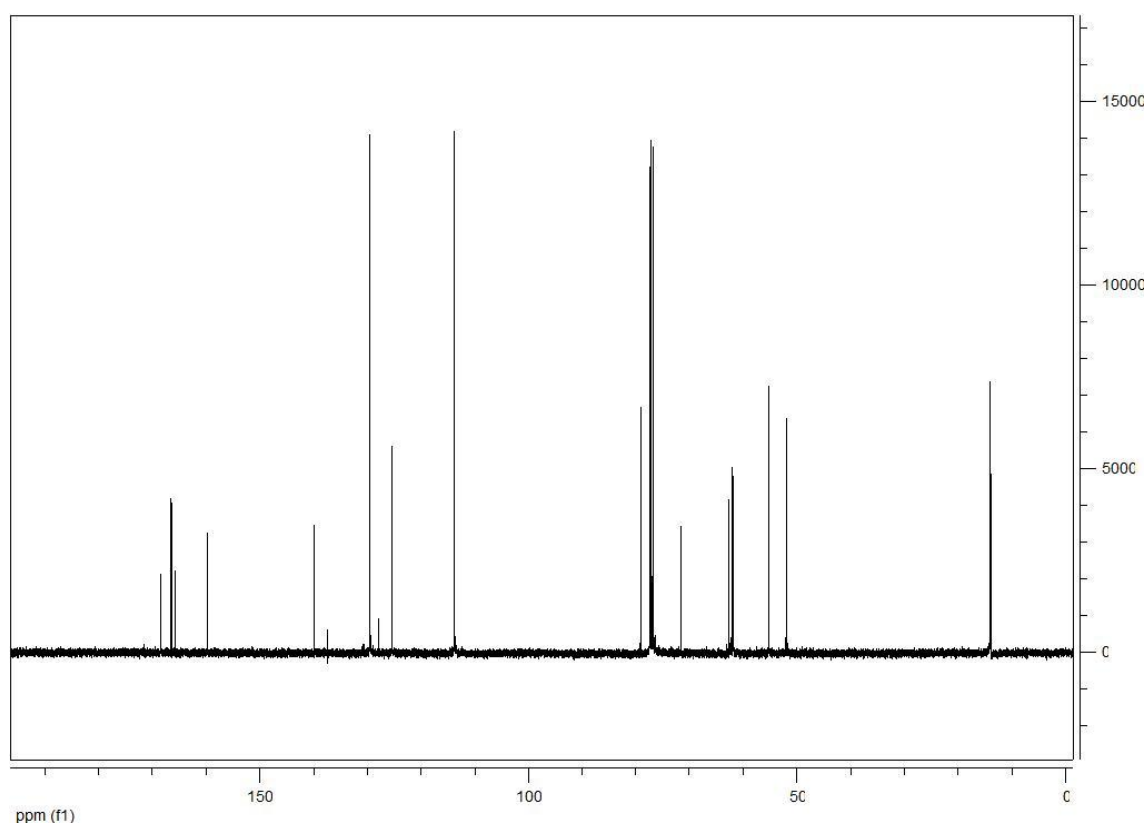

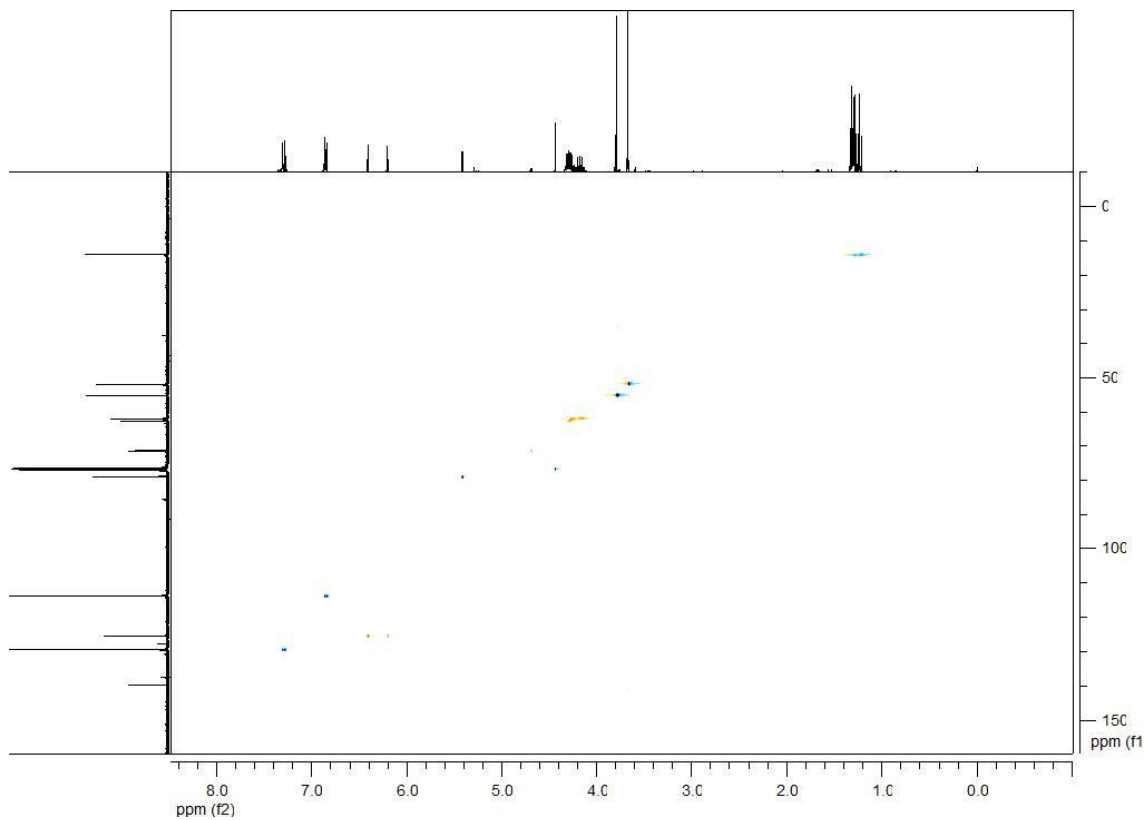



**diethyl 4-methylene-5-oxo-3-phenyldihydrofuran-2,2(3H)-dicarboxylate**

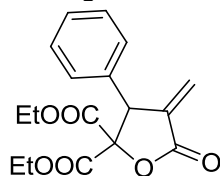

$^1\text{H}$  NMR (400 MHz,  $\text{CDCl}_3$ )  $\delta$  7.35–7.30 (m, 5H), 6.55 (d,  $J=3.3\text{Hz}$ , 1H), 5.64 (d,  $J=3.1\text{Hz}$ , 1H), 5.07 (t,  $J=3.1\text{Hz}$ , 1H), 4.45–4.25 (m, 2H), 3.90–3.80 (m, 1H), 3.65–3.55 (m, 1H), 1.31 (t,  $J=7.2\text{Hz}$ , 3H), 0.84 (t,  $J=7.2\text{Hz}$ , 3H).

$^{13}\text{C}$  NMR (100 MHz,  $\text{CDCl}_3$ )  $\delta$  167.7, 165.9, 165.4, 137.5, 136.0, 135.2, 129.6, 128.6, 128.5, 125.9, 86.8, 63.1, 62.4, 50.5, 13.9, 13.4.

HRMS (ESI) calcd. for  $\text{C}_{17}\text{H}_{19}\text{O}_6$  ( $\text{M}+\text{H}$ ) $^+$  319.1176, found 319.1182.

**Enantiomeric excess:** -91% (b-ICPD)/ +91% ((DHQD) $_2$ PHAL), determined by HPLC (Daicel Chiralpak IB, Hexane/i-PrOH 95:5), UV 210 nm, flow rate 1 mL/min,  $t_R$ = 10.3, 11.6

$[\alpha]_D^{25} = +14$  ( $c=0.3$ ,  $\text{CHCl}_3$ , -91% ee)

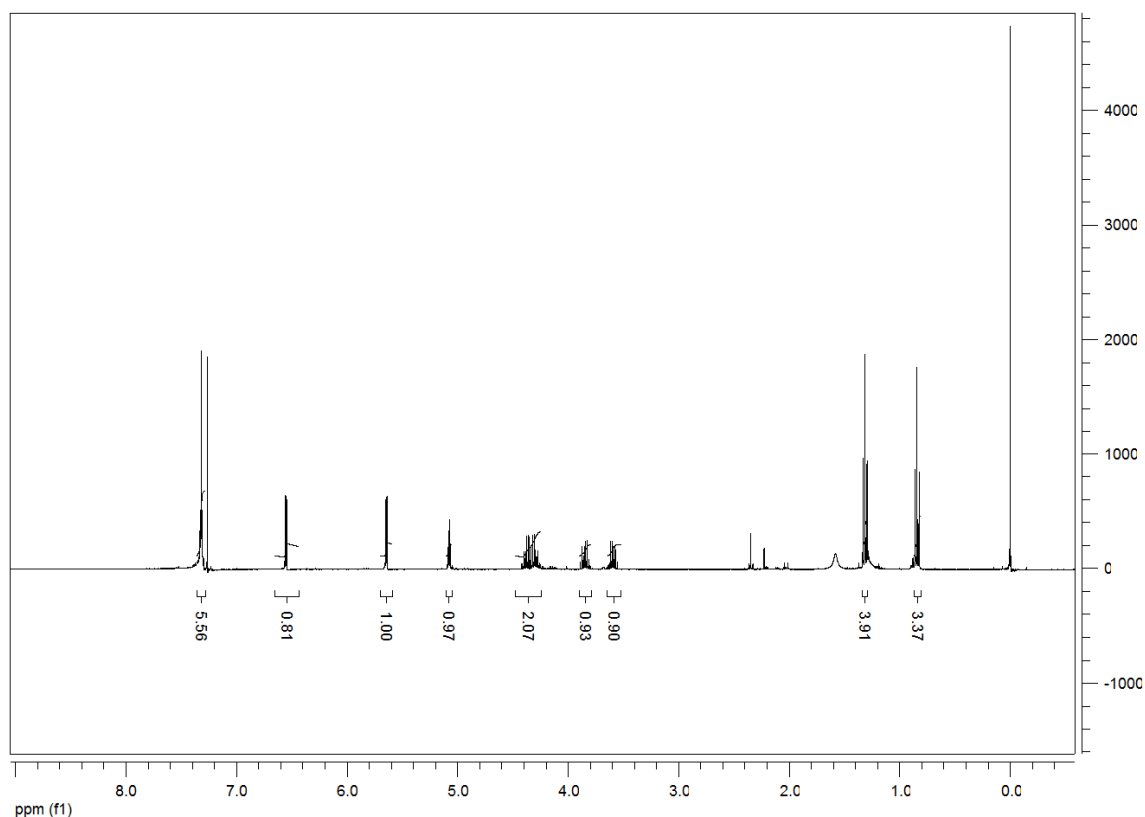

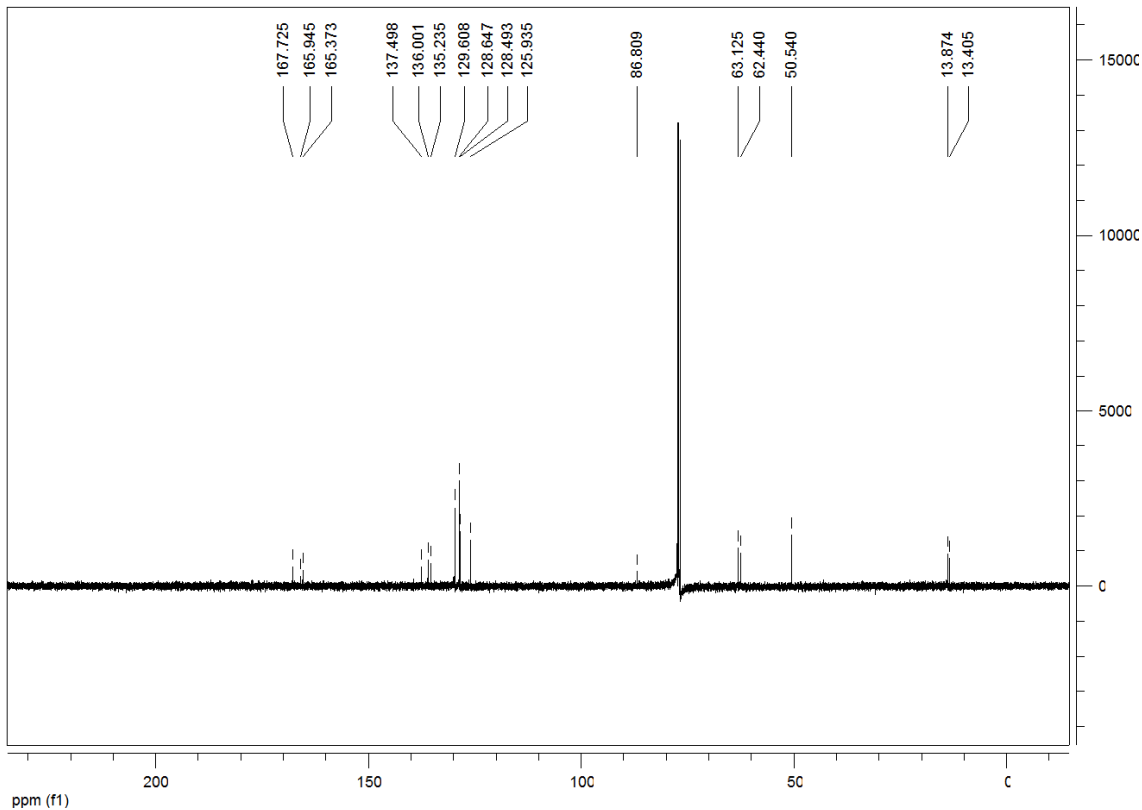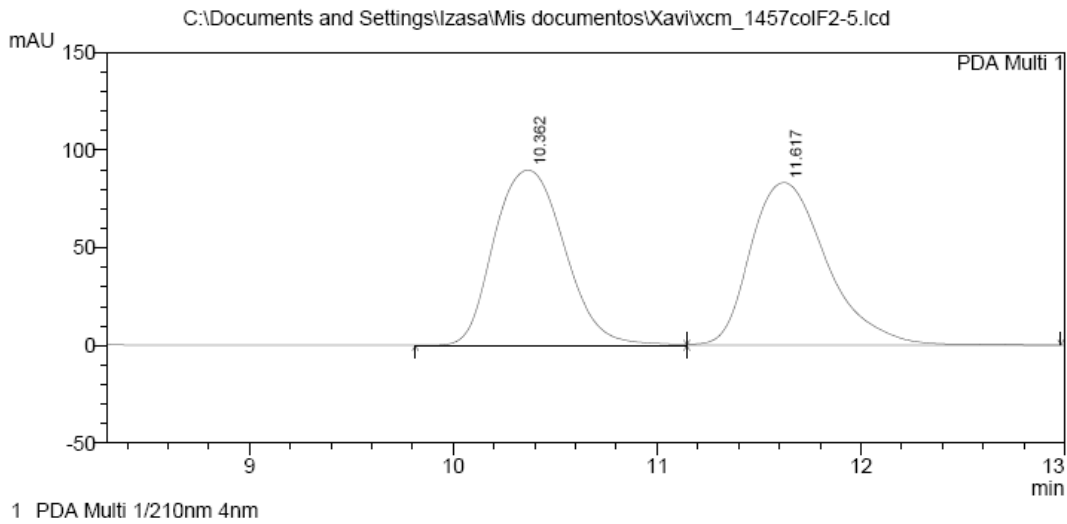

PeakTable

| Peak# | Ret. Time | Area    | Height | Area %  | Height % |
|-------|-----------|---------|--------|---------|----------|
| 1     | 10.362    | 2156825 | 89602  | 49.786  | 51.870   |
| 2     | 11.617    | 2175373 | 83142  | 50.214  | 48.130   |
| Total |           | 4332198 |        | 100.000 |          |

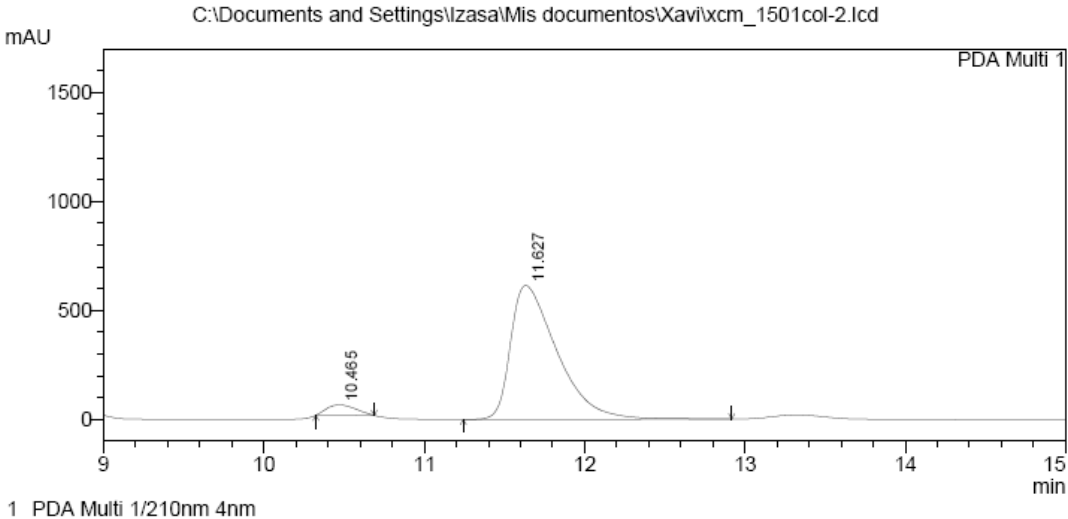

PeakTable

PDA Ch1 210nm 4nm

| Peak# | Ret. Time | Area     | Height | Area %  | Height % |
|-------|-----------|----------|--------|---------|----------|
| 1     | 10.465    | 597305   | 47751  | 4.622   | 7.219    |
| 2     | 11.627    | 12325669 | 613751 | 95.378  | 92.781   |
| Total |           | 12922974 | 661502 | 100.000 | 100.000  |

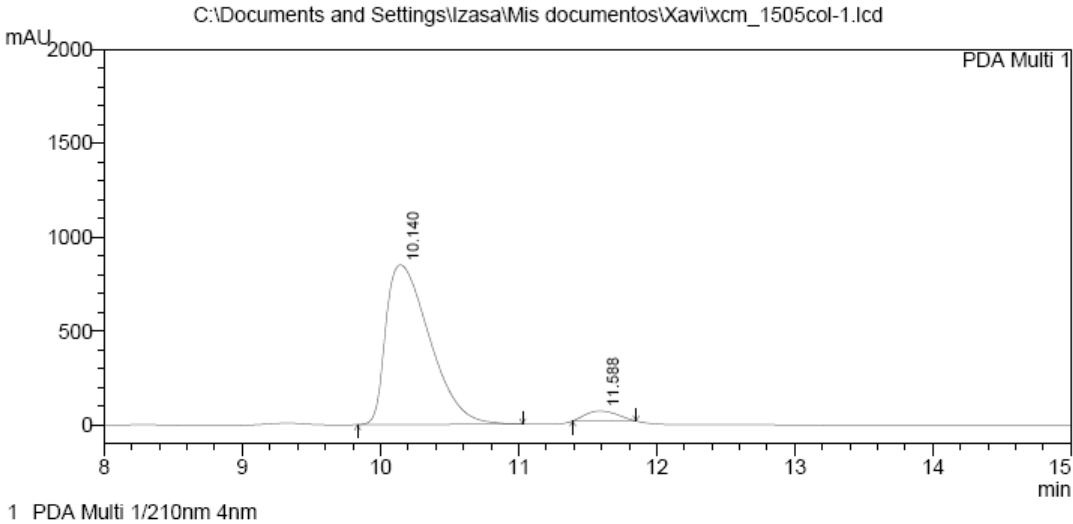

PeakTable

PDA Ch1 210nm 4nm

| Peak# | Ret. Time | Area     | Height | Area %  | Height % |
|-------|-----------|----------|--------|---------|----------|
| 1     | 10.140    | 18734231 | 848789 | 95.617  | 94.119   |
| 2     | 11.588    | 858840   | 53034  | 4.383   | 5.881    |
| Total |           | 19593071 | 901823 | 100.000 | 100.000  |

**diethyl 3-(4-bromophenyl)-4-methylene-5-oxodihydrofuran-2,2(3H)-dicarboxylate**

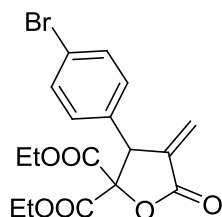

**$^1\text{H}$  NMR (400 MHz,  $\text{CDCl}_3$ )**  $\delta$  7.47 (d,  $J=8.7\text{Hz}$ , 2H), 7.20 (d,  $J=8.7\text{Hz}$ , 2H), 6.56 (d,  $J=3.5\text{Hz}$ , 1H), 5.62 (d,  $J=3.5\text{Hz}$ , 1H), 5.03 (t, 3.5Hz, 1H), 4.40–4.28 (m, 2H), 3.93–3.86 (m, 1H), 3.72–3.64 (m, 1H), 1.32 (t,  $J=7.6\text{Hz}$ , 3H), 0.91 (t,  $J=7.2\text{Hz}$ , 3H).

**$^{13}\text{C}$  NMR (100 MHz,  $\text{CDCl}_3$ )**  $\delta$  167.4, 165.8, 165.3, 135.6, 134.1, 131.8, 131.5, 131.3, 129.3, 126.1, 122.7, 86.5, 63.3, 62.7, 50.0, 13.9, 13.5.  
HRMS (ESI) calcd. for  $\text{C}_{17}\text{H}_{21}\text{BrNO}_6$  ( $\text{M}+\text{NH}_4$ ) $^+$  414.0547, found 414.0543.

**Enantiomeric excess:** 91%, determined by HPLC (Daicel Chiralpak IC, i-PrOH/Hexane=10/90), UV 220 nm, flow rate 1 mL/min,  $t_R$ = 41.2 min, 76.4 min.

$[\alpha]_D^{25} = +54$  ( $c=0.4$ ,  $\text{CHCl}_3$ , 91% ee)

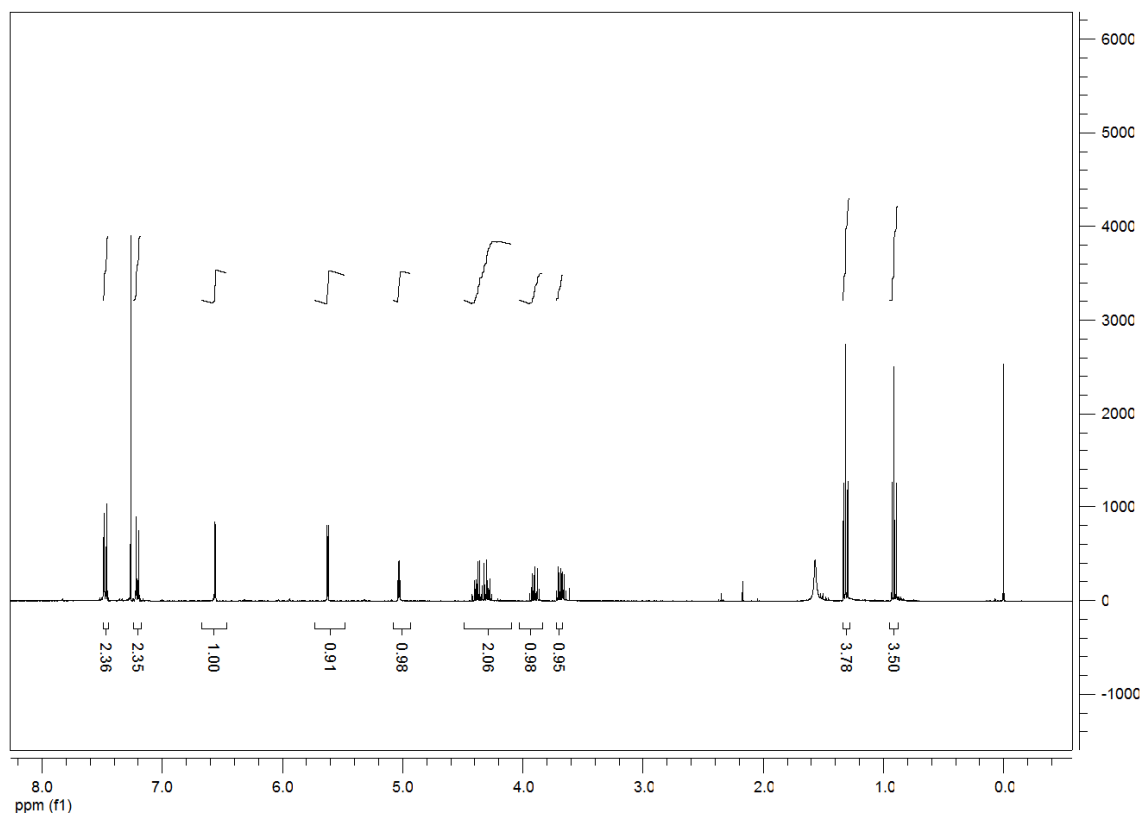

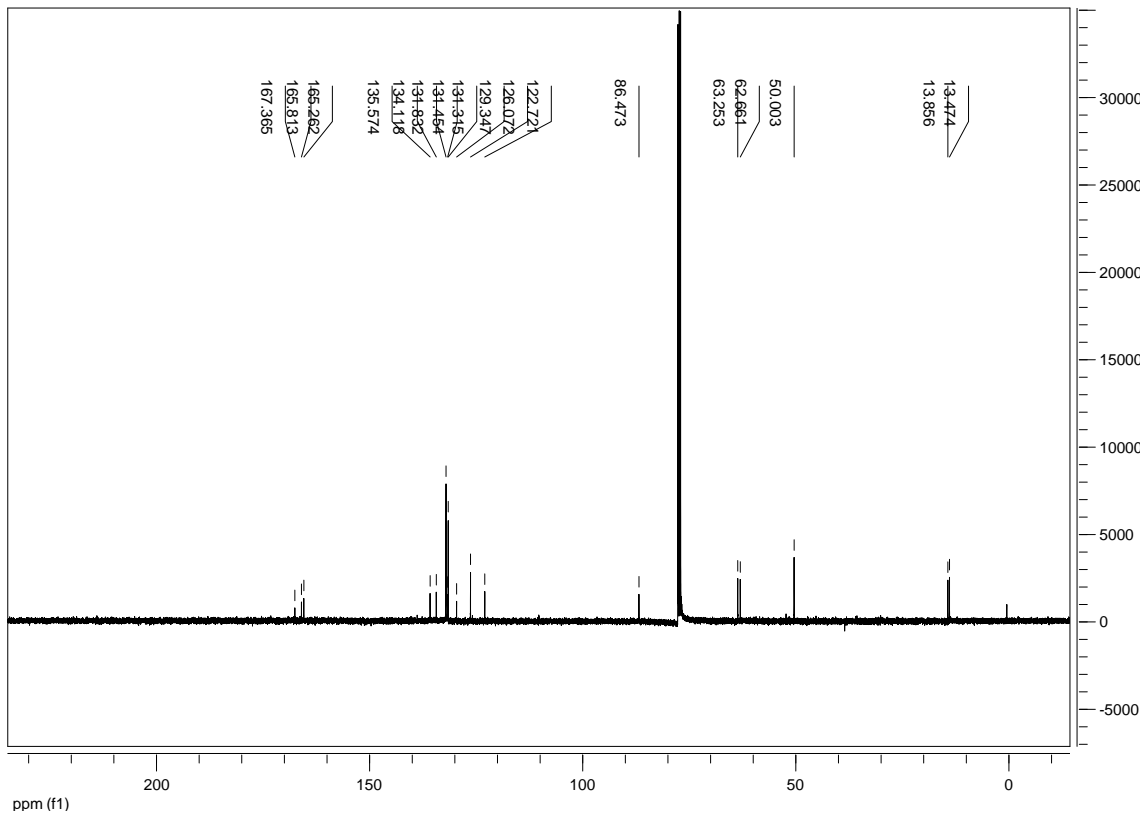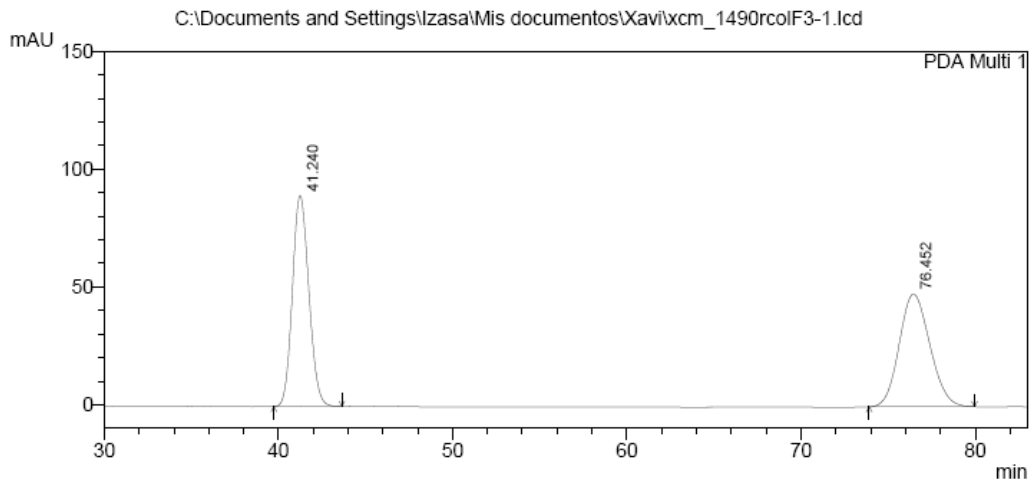

1 PDA Multi 1/220nm 4nm

PeakTable

| PDA Ch1 220nm 4nm |           |          |        |         |          |
|-------------------|-----------|----------|--------|---------|----------|
| Peak#             | Ret. Time | Area     | Height | Area %  | Height % |
| 1                 | 41.240    | 5868186  | 89476  | 50.147  | 65.195   |
| 2                 | 76.452    | 5833835  | 47768  | 49.853  | 34.805   |
| Total             |           | 11702020 | 137244 | 100.000 | 100.000  |

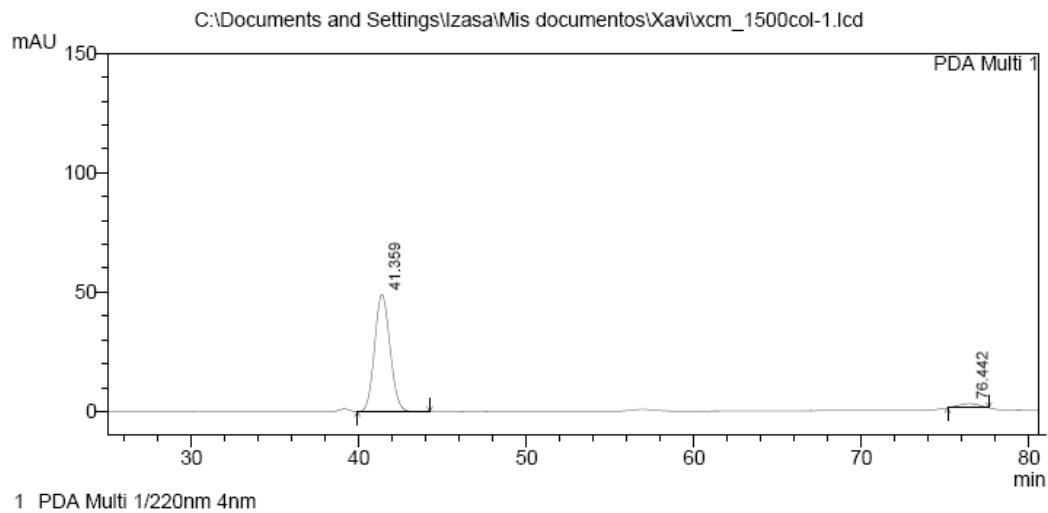

PeakTable

PDA Ch1 220nm 4nm

| Peak# | Ret. Time | Area    | Height | Area %  | Height % |
|-------|-----------|---------|--------|---------|----------|
| 1     | 41.359    | 3144231 | 49071  | 95.462  | 96.622   |
| 2     | 76.442    | 149477  | 1715   | 4.538   | 3.378    |
| Total |           | 3293708 | 50786  | 100.000 | 100.000  |

**diethyl 3-(4-fluorophenyl)-4-methylene-5-oxodihydrofuran-2,2(3H)-dicarboxylate**

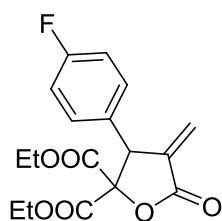

**<sup>1</sup>H NMR (400 MHz, CDCl<sub>3</sub>)**  $\delta$  7.39–7.25 (m, 2H), 7.02 (t, J=8.6Hz, 2H), 6.55 (d, J= 3.3Hz, 1H), 5.62 (d, J=3.2Hz, 1H), 5.05 (t, J=3.2Hz, 1H), 4.43–4.24 (m, 2H), 3.94–3.84 (m, 1H), 3.71–3.60 (m, 1H), 1.31 (t, J=7.1Hz, 3H), 0.90 (t, J=7.1Hz, 3H).

**<sup>13</sup>C NMR (100 MHz, CDCl<sub>3</sub>)**  $\delta$  167.4, 165.9, 165.3, 162.6 (d, JC-F=248Hz), 135.9, 131.4, 131.3, 130.8, 130.8, 125.9, 115.7, 115.5, 86.6, 63.2, 62.5, 49.8, 13.8, 13.5.

**<sup>19</sup>F NMR (376 MHz, CDCl<sub>3</sub>)**  $\delta$  -112.9.

HRMS (ESI) calcd. for C<sub>17</sub>H<sub>18</sub>FO<sub>6</sub> (M+H)<sup>+</sup> 337.1082, found 337.1081.

**Enantiomeric excess:** 84% ( $\beta$ -ICPN) / 96% ((DHQD)<sub>2</sub>PHAL), determined by HPLC (Daicel Chiralpak IC)

i-PrOH/Hexane=20/80), UV 210 nm, flow rate 1 mL/min, t<sub>R</sub>= 21.5min, 42.1 min.

[ $\alpha$ ]<sub>D</sub><sup>25</sup>= +63 (c=0.6, CHCl<sub>3</sub>, 84% ee) S-Catalyst

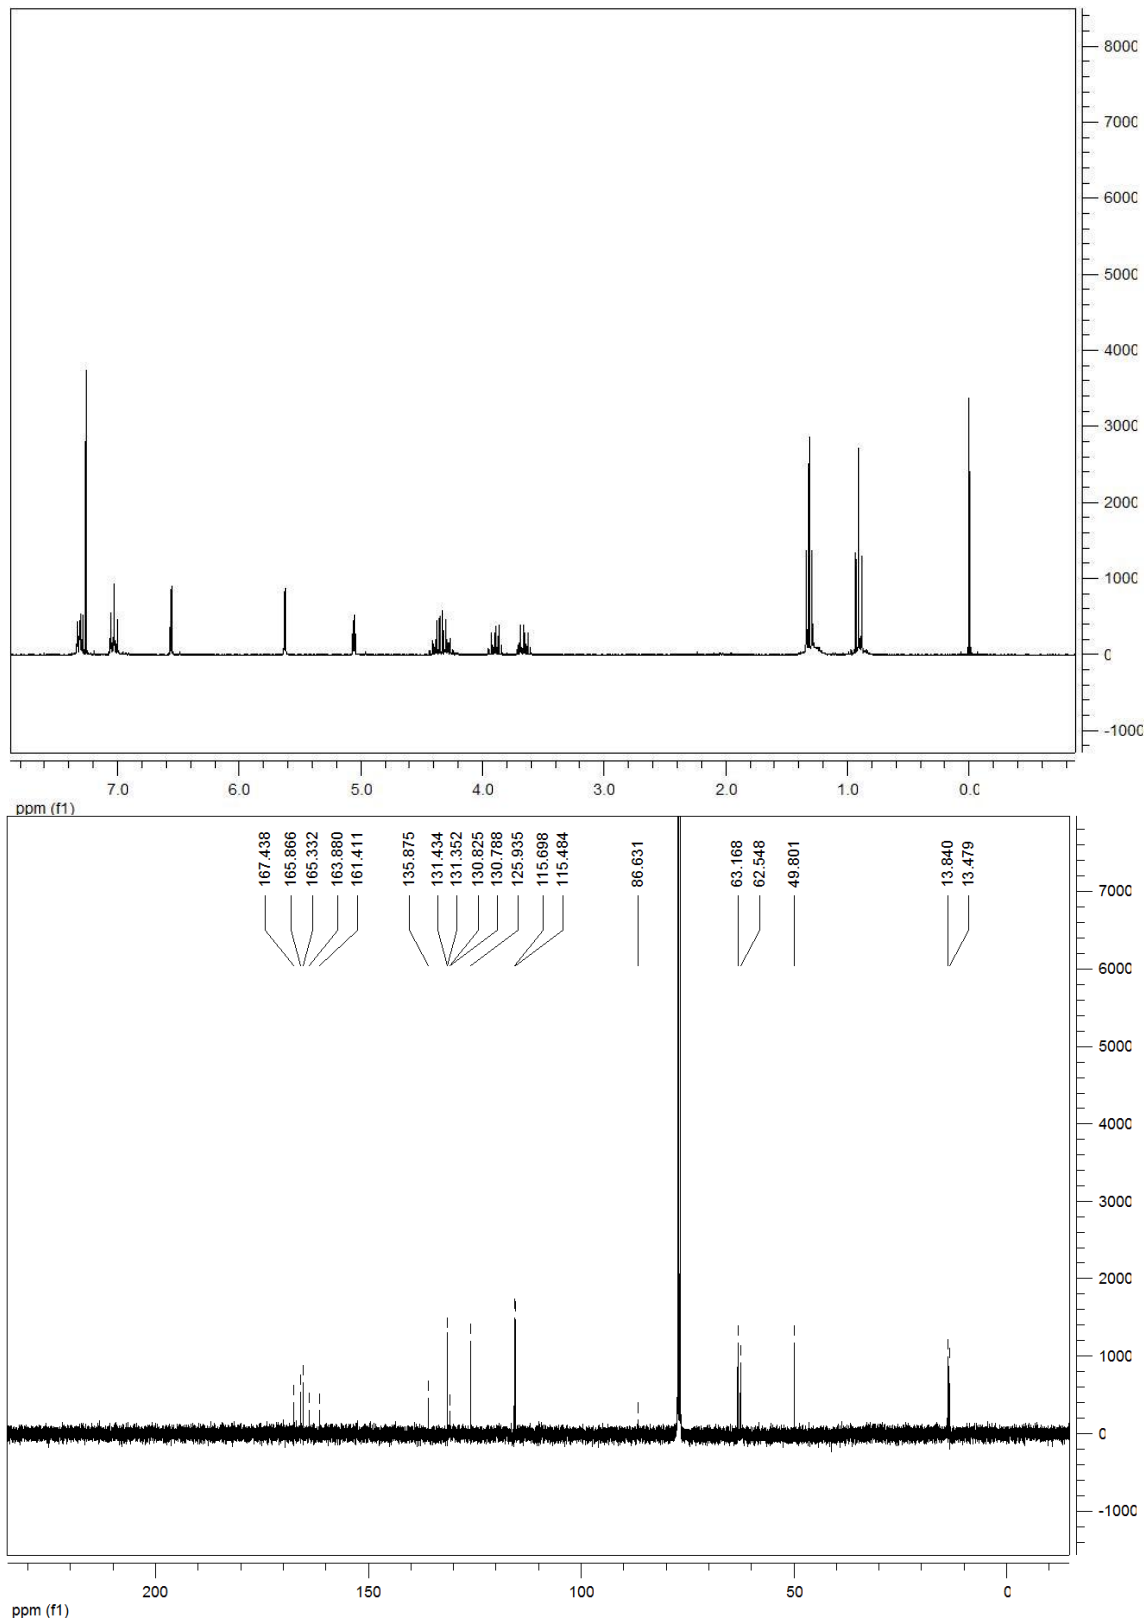



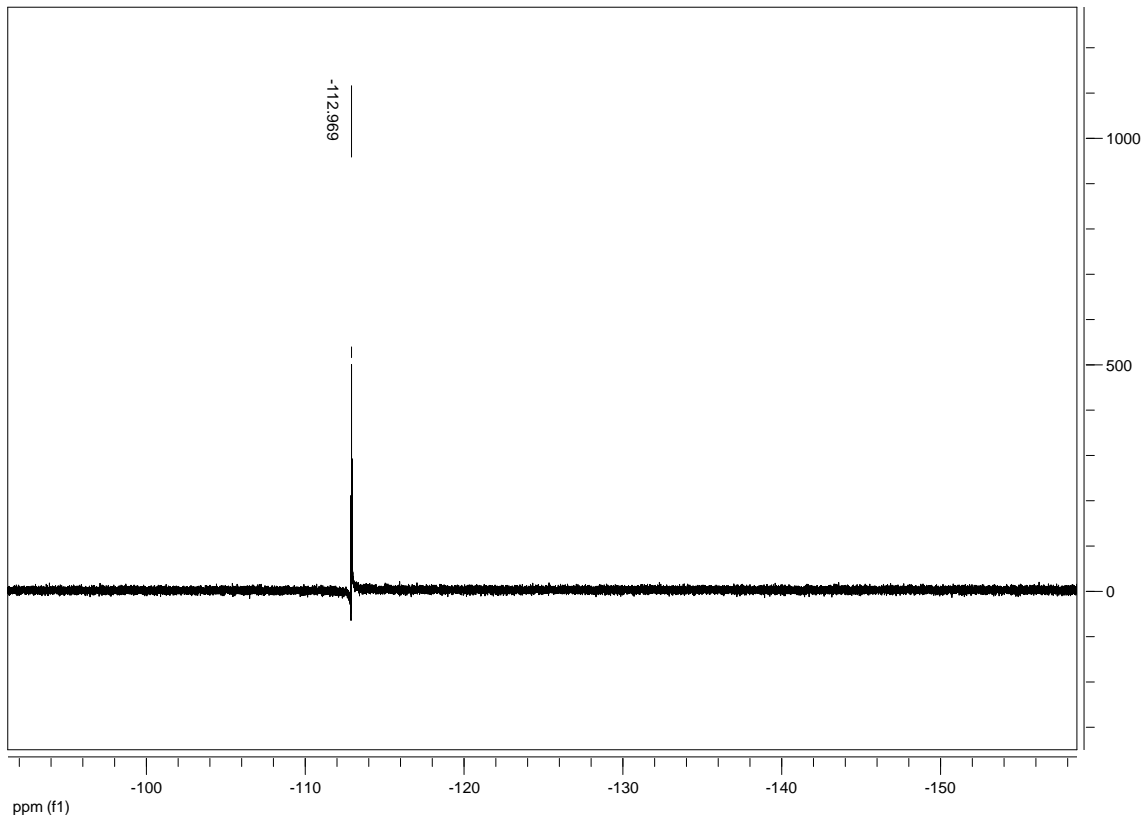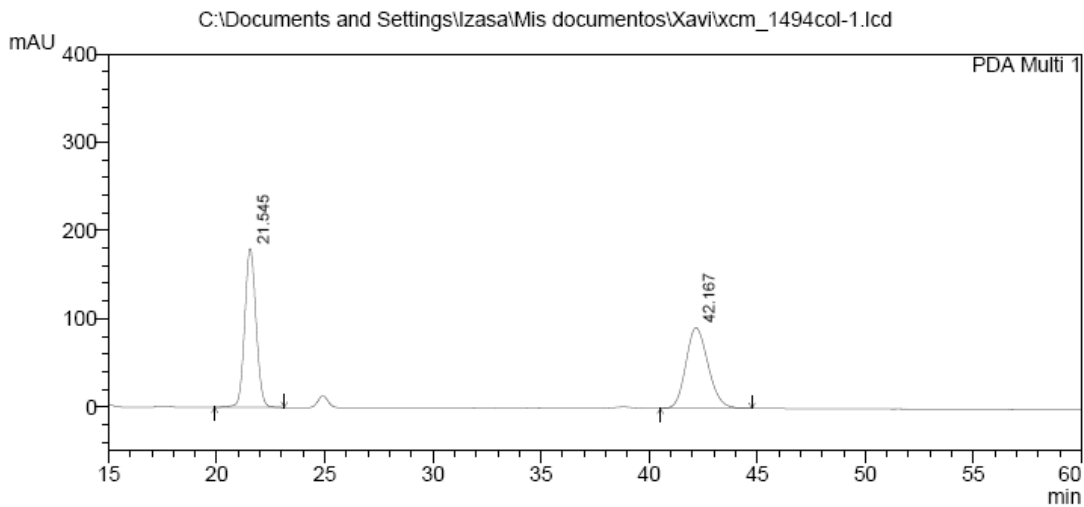

1 PDA Multi 1/210nm 4nm

PeakTable

| PDA Ch1 210nm 4nm |           |          |        |         |          |
|-------------------|-----------|----------|--------|---------|----------|
| Peak#             | Ret. Time | Area     | Height | Area %  | Height % |
| 1                 | 21.545    | 6571229  | 180130 | 50.065  | 66.347   |
| 2                 | 42.167    | 6554070  | 91369  | 49.935  | 33.653   |
| Total             |           | 13125298 | 271499 | 100.000 | 100.000  |

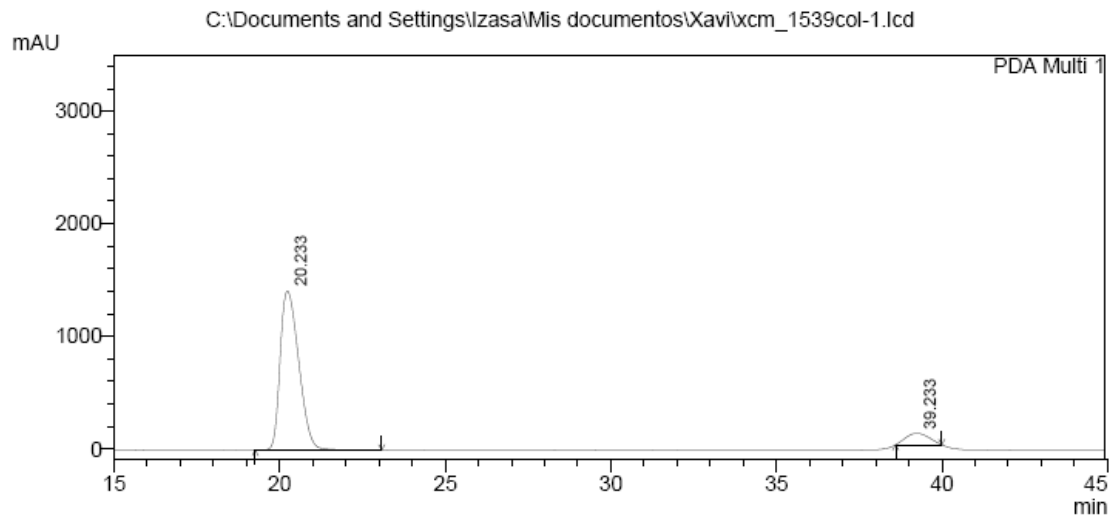

PeakTable

| Peak# | Ret. Time | Area     | Height  | Area %  | Height % |
|-------|-----------|----------|---------|---------|----------|
| 1     | 20.233    | 55123690 | 1411861 | 91.774  | 93.281   |
| 2     | 39.233    | 4940900  | 101689  | 8.226   | 6.719    |
| Total |           | 60064590 | 1513551 | 100.000 | 100.000  |

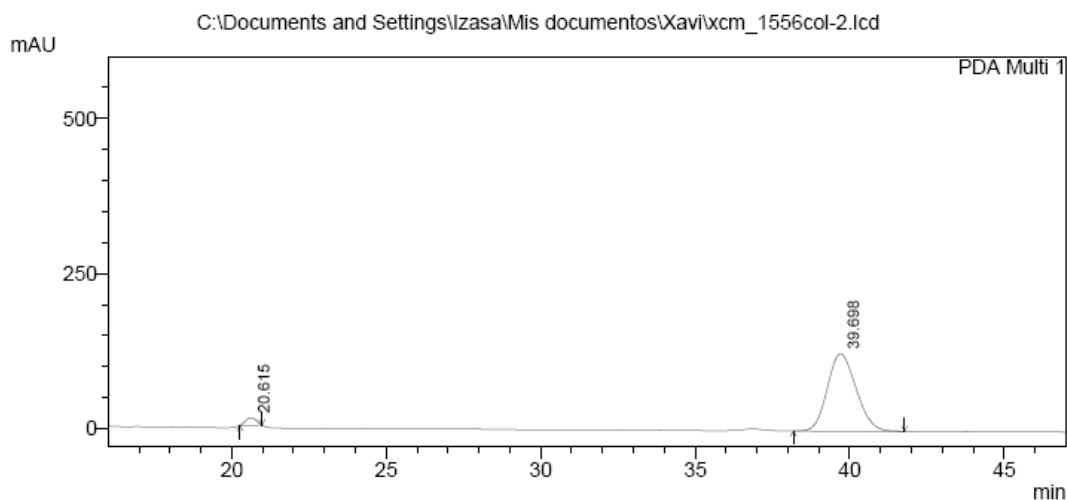

PeakTable

| Peak# | Ret. Time | Area    | Height | Area %  | Height % |
|-------|-----------|---------|--------|---------|----------|
| 1     | 20.615    | 293022  | 12054  | 3.495   | 8.795    |
| 2     | 39.698    | 8092152 | 125006 | 96.505  | 91.205   |
| Total |           | 8385174 | 137061 | 100.000 | 100.000  |

**diethyl 3-(4-methoxyphenyl)-4-methylene-5-oxodihydrofuran-2,2(3H)-dicarboxylate**

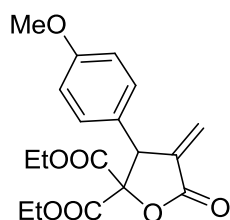

**<sup>1</sup>H NMR (400 MHz, CDCl<sub>3</sub>)**  $\delta$  7.23 (d, *J*=8.7Hz, 2H), 6.85 (d, *J*=8.9Hz, 2H), 6.53 (d, *J*=3.5Hz, 1H), 5.62 (d, *J*=3.0Hz, 1H), 5.01 (t, 3.0Hz, 1H), 4.42-4.24 (m, 2H), 3.95-3.84 (m, 1H), 3.79 (s, 3H), 3.74-3.60 (m, 1H), 1.31 (t, *J*=7.3Hz, 3H), 0.90 (t, *J*=7.3Hz, 3H).

**<sup>13</sup>C NMR (100 MHz, CDCl<sub>3</sub>)**  $\delta$  167.8, 166.0, 165.5, 159.6, 136.2, 130.7, 126.9, 125.7, 113.9, 86.9, 63.0, 62.4, 55.3, 49.9, 13.8, 13.5.

**HRMS (ESI)** calcd. for C<sub>18</sub>H<sub>21</sub>O<sub>7</sub> (M+H)<sup>+</sup> 349.1282, found 349.1288.

**Enantiomeric excess:** 93% ( $\beta$ -ICPN) / -88% ((DHQD)<sub>2</sub>PHAL) determined by HPLC (Daicel Chiralpak IA, i-PrOH/Hexane= 20:80), UV 210 nm, flow rate 1 mL/min, *t<sub>R</sub>*= 39.2 min, 94.1 min.

$[\alpha]_D^{25}$  = +44 (*c*=0.5, CHCl<sub>3</sub>, 93% ee)

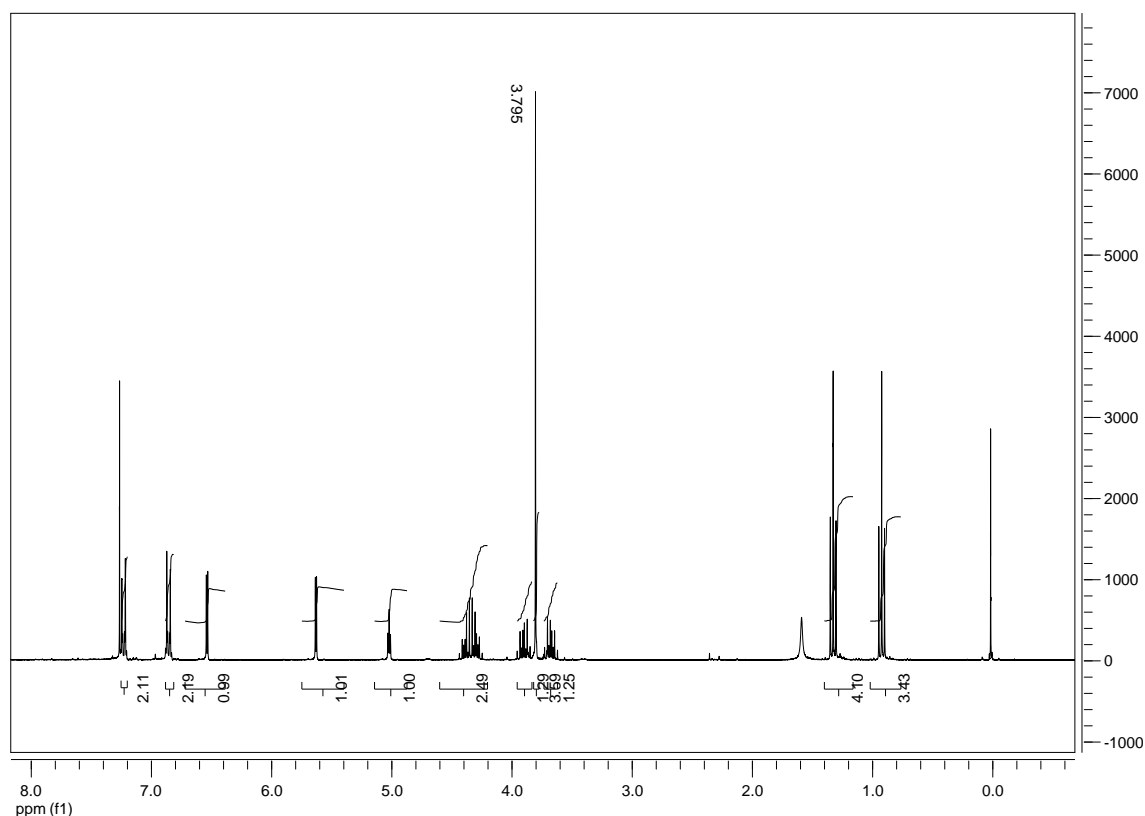

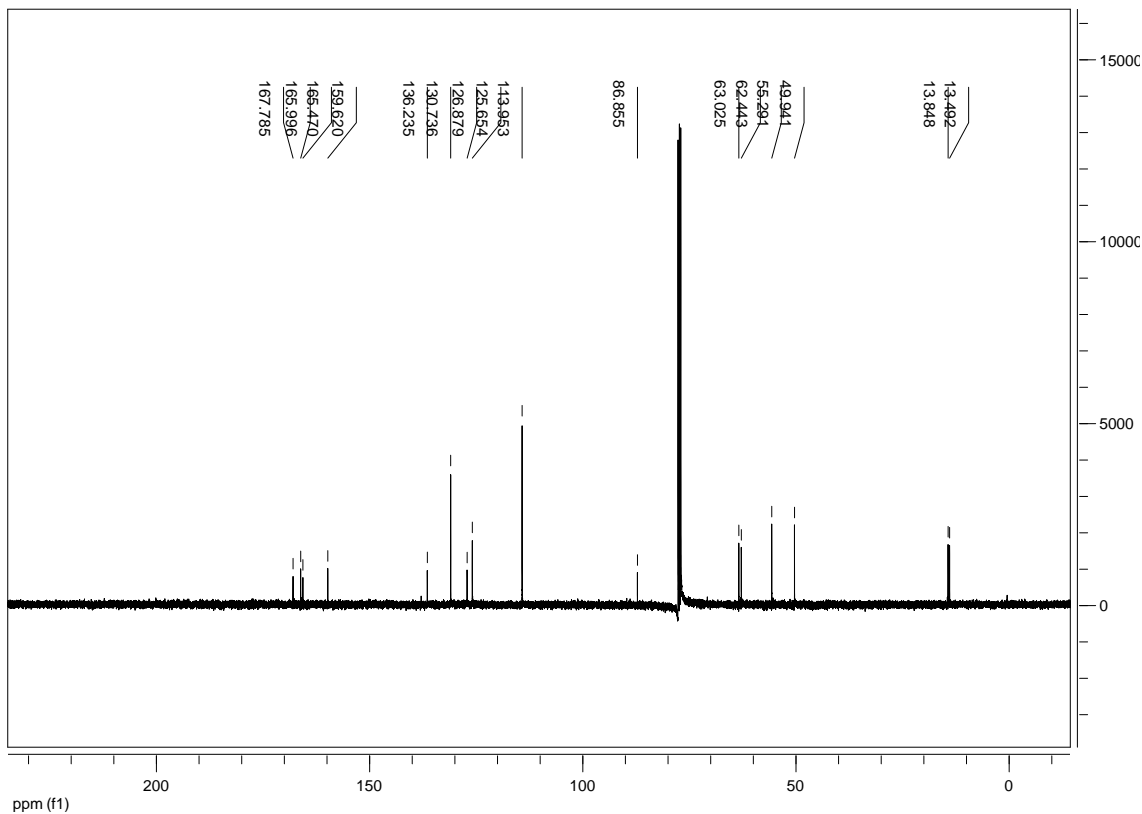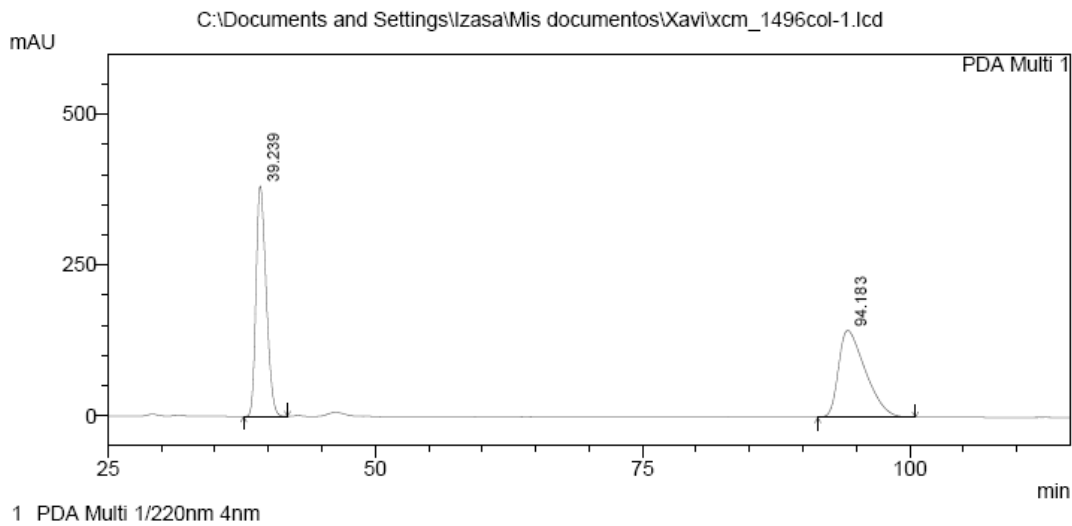

PeakTable

| Peak# | Ret. Time | Area     | Height | Area %  | Height % |
|-------|-----------|----------|--------|---------|----------|
| 1     | 39.239    | 25219497 | 381921 | 50.000  | 72.607   |
| 2     | 94.183    | 25219931 | 144090 | 50.000  | 27.393   |
| Total |           | 50439428 | 526011 | 100.000 | 100.000  |

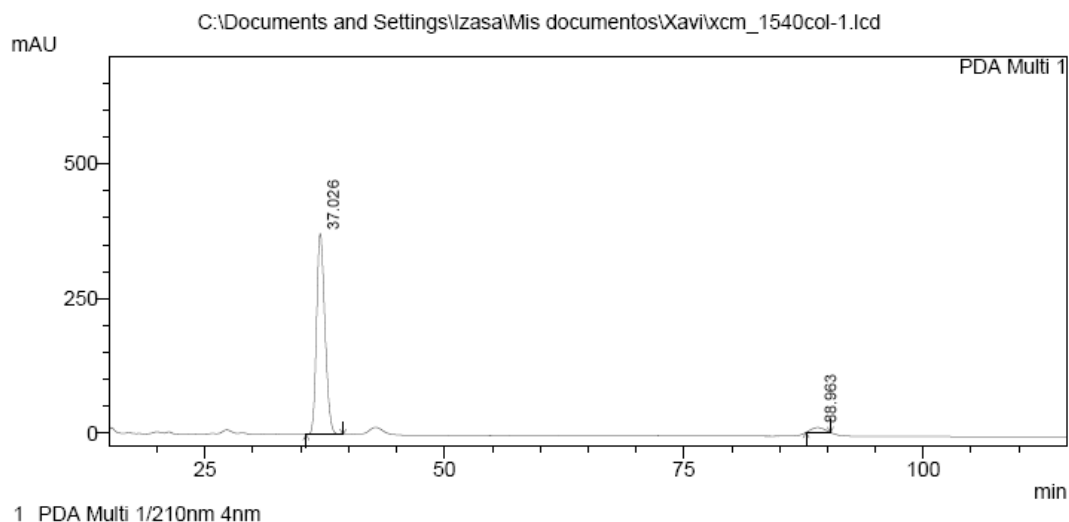

PeakTable

PDA Ch1 210nm 4nm

| Peak# | Ret. Time | Area     | Height | Area %  | Height % |
|-------|-----------|----------|--------|---------|----------|
| 1     | 37.026    | 22816833 | 373116 | 96.515  | 97.670   |
| 2     | 88.963    | 823981   | 8901   | 3.485   | 2.330    |
| Total |           | 23640814 | 382016 | 100.000 | 100.000  |

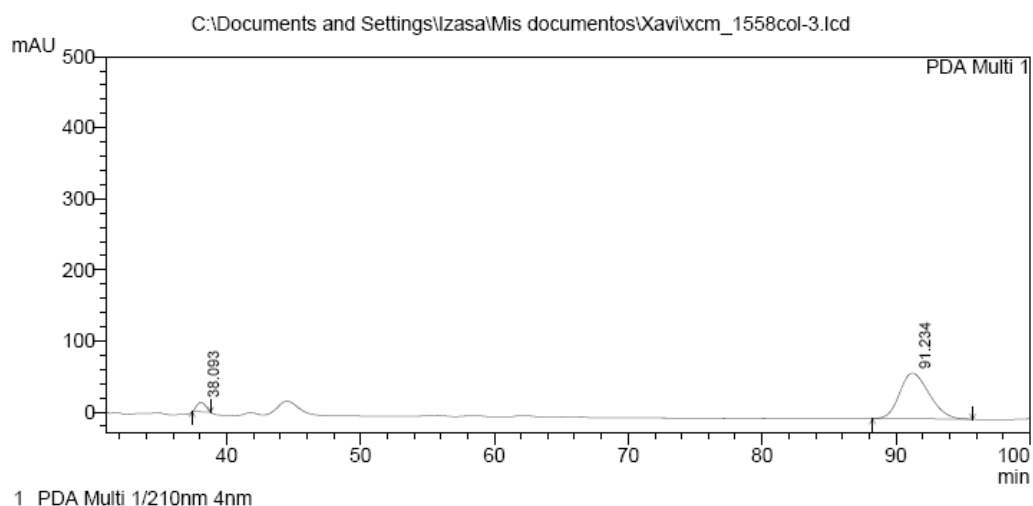

PeakTable

PDA Ch1 210nm 4nm

| Peak# | Ret. Time | Area     | Height | Area %  | Height % |
|-------|-----------|----------|--------|---------|----------|
| 1     | 38.093    | 614398   | 13145  | 5.838   | 16.966   |
| 2     | 91.234    | 9908909  | 64330  | 94.162  | 83.034   |
| Total |           | 10523307 | 77474  | 100.000 | 100.000  |

**diethyl 4-methylene-3-(naphthalen-1-yl)-5-oxodihydrofuran-2,2(3H)-dicarboxylate**

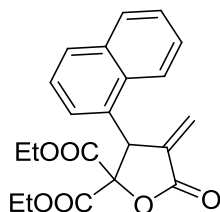

**<sup>1</sup>H NMR (400 MHz, CDCl<sub>3</sub>)**  $\delta$  8.46 (d, *J*=8.7Hz, 1H), 7.87 (d, *J*=8.4Hz, 1H), 7.80 (d, *J*=8.2Hz, 1H), 7.65–7.50 (m, 2H), 7.40 (t, *J*=7.4Hz, 1H), 6.85 (dd, *J*=7.4Hz, *J*=1.3Hz, 1H), 6.59 (d, *J*=2.5Hz, 1H), 6.09 (t, 2.7Hz, 1H), 5.65 (d, *J*=2.7Hz, 1H), 4.44–4.27 (m, 2H), 3.61–3.51 (m, 1H), 3.20–3.10 (m, 1H), 1.30 (t, *J*=7.0Hz, 3H), 0.39 (t, *J*=7.2Hz, 3H).

**<sup>13</sup>C NMR (100 MHz, CDCl<sub>3</sub>)**  $\delta$  167.7, 166.3, 164.8, 137.7, 134.3, 133.5, 132.6, 129.0, 127.1, 127.0, 126.8, 126.1, 125.2, 123.5, 87.2, 63.4, 62.0, 44.5, 13.8, 12.8.

**HRMS (ESI)** calcd. for C<sub>21</sub>H<sub>21</sub>O<sub>6</sub> (M+H)<sup>+</sup> 369.1333 found 369.1350.

**Enantiomeric excess:** 68% (β-ICPN) / -71 % ((DHQD)<sub>2</sub>PHAL) determined by HPLC (Daicel Chiralpak IC, i-PrOH/Hexane=20/80), UV 220 nm, flow rate 1 mL/min, *t<sub>R</sub>*= 28.8 min, 35.9 min.

[ $\alpha$ ]<sub>D</sub><sup>25</sup>= +52 (c=0.4, CHCl<sub>3</sub>, 68% ee)

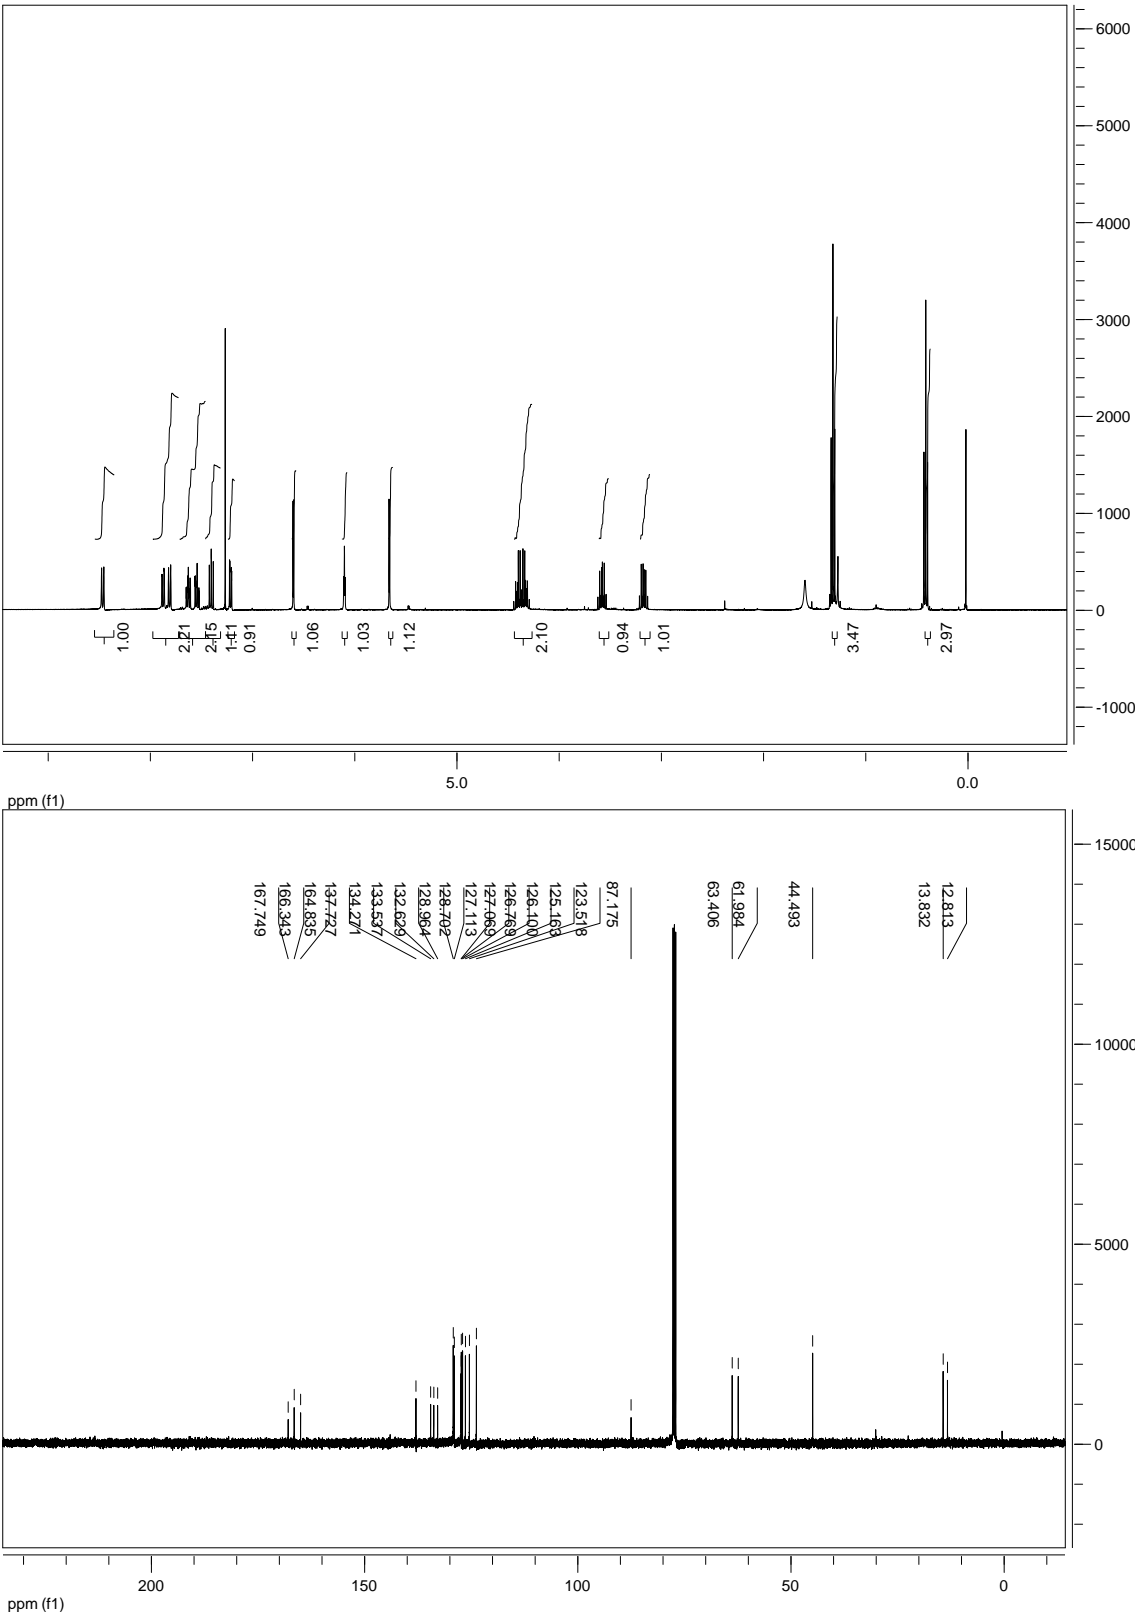

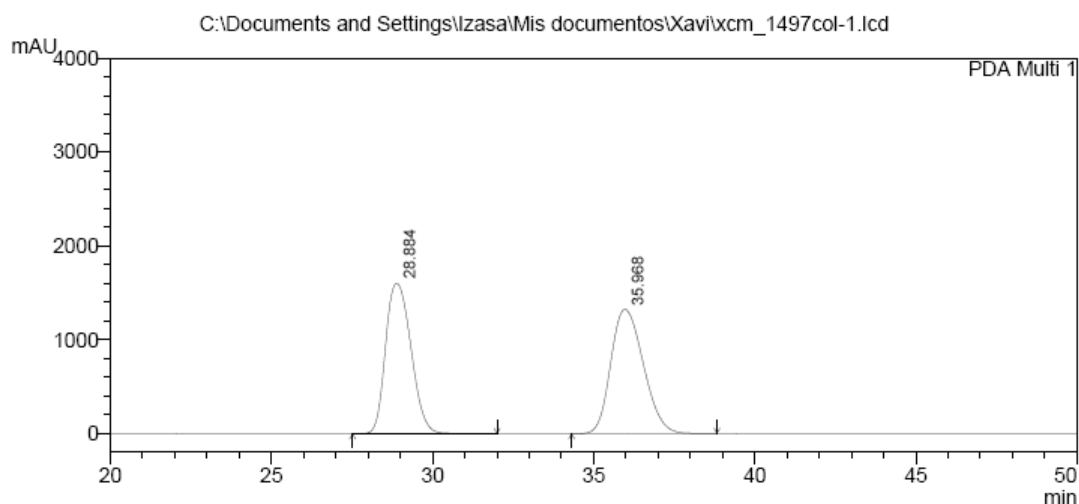

PeakTable

PDA Ch1 220nm 4nm

| Peak# | Ret. Time | Area      | Height  | Area %  | Height % |
|-------|-----------|-----------|---------|---------|----------|
| 1     | 28.884    | 87896990  | 1602887 | 48.573  | 54.789   |
| 2     | 35.968    | 93063407  | 1322694 | 51.427  | 45.211   |
| Total |           | 180960397 | 2925581 | 100.000 | 100.000  |

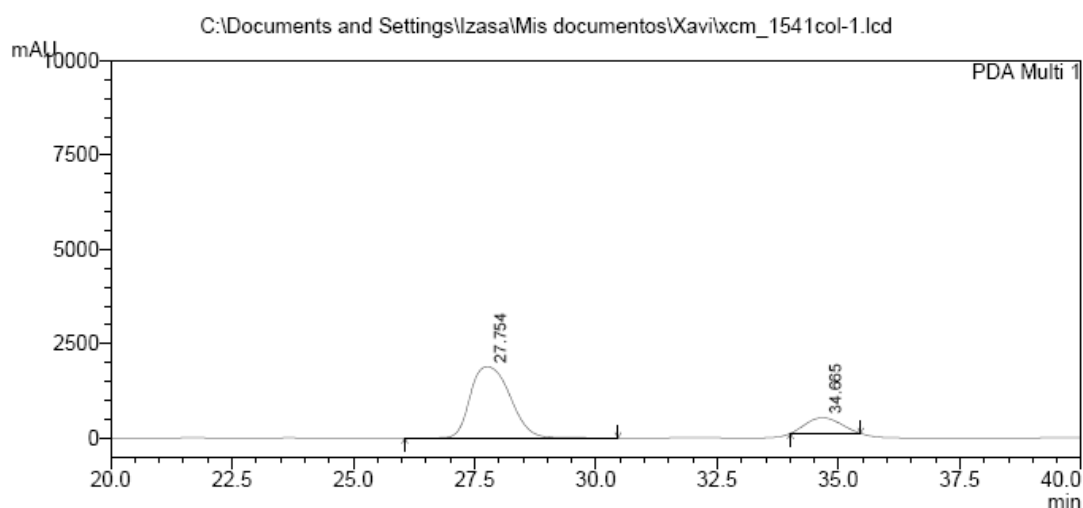

PeakTable

PDA Ch1 220nm 4nm

| Peak# | Ret. Time | Area      | Height  | Area %  | Height % |
|-------|-----------|-----------|---------|---------|----------|
| 1     | 27.754    | 107692494 | 1892486 | 84.021  | 81.995   |
| 2     | 34.665    | 20480628  | 415574  | 15.979  | 18.005   |
| Total |           | 128173122 | 2308060 | 100.000 | 100.000  |



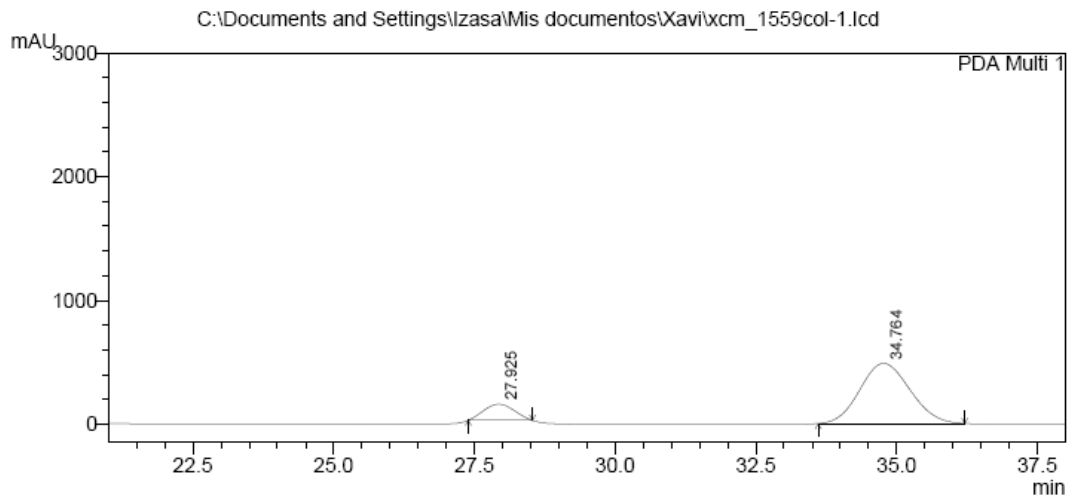

1 PDA Multi 1/220nm 4nm

PeakTable

| PDA Ch1 220nm 4nm |           |          |        |         |          |
|-------------------|-----------|----------|--------|---------|----------|
| Peak#             | Ret. Time | Area     | Height | Area %  | Height % |
| 1                 | 27.925    | 4900167  | 129656 | 14.015  | 21.084   |
| 2                 | 34.764    | 30062937 | 485281 | 85.985  | 78.916   |
| Total             |           | 34963104 | 614937 | 100.000 | 100.000  |

**diethyl 4-methylene-3-(naphthalen-2-yl)-5-oxodihydrofuran-2,2(3H)-dicarboxylate**

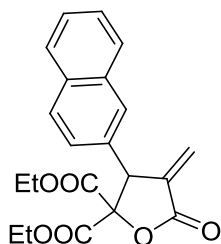

**<sup>1</sup>H NMR (400 MHz, CDCl<sub>3</sub>)**  $\delta$  7.84–7.78 (m, 4H), 7.52–7.47 (m, 2H), 7.38 (dd,  $J=8.8\text{Hz}$ ,  $J=1.7\text{Hz}$ , 1H), 6.60 (d,  $J=3.1\text{Hz}$ , 1H), 5.67 (d,  $J=2.7\text{Hz}$ , 1H), 5.25 (t,  $J=2.7\text{Hz}$ , 1H), 4.44–4.26 (m, 2H), 3.81–3.71 (m, 1H), 3.52–3.43 (m, 1H), 1.32 (t,  $J=7.0\text{Hz}$ , 3H), 0.65 (t,  $J=7.4\text{Hz}$ , 3H).

**<sup>13</sup>C NMR (100 MHz, CDCl<sub>3</sub>)**  $\delta$  167.7, 166.0, 165.4, 136.1, 133.1, 133.0, 132.5, 129.1, 128.3, 127.9, 127.6, 126.7, 126.6, 126.5, 126.1, 86.8, 63.2, 62.4, 50.7, 13.9, 13.2.

**HRMS (ESI)** calcd. for C<sub>21</sub>H<sub>21</sub>O<sub>6</sub> (M+H)<sup>+</sup> 369.1333, found 369.1344.

**Enantiomeric excess:** -93% ( $\beta$ -ICPN) / 84% ((DHQD)<sub>2</sub>PHAL), determined by HPLC (Daicel Chiralpak IB, i-PrOH/Hexane=5/95), UV 220 nm, flow rate 1 mL/min,  $t_R$ = 15.5 min, 16.6 min.

$[\alpha]_D^{25}$  = +48 (c=0.6, CHCl<sub>3</sub>, -93% ee)

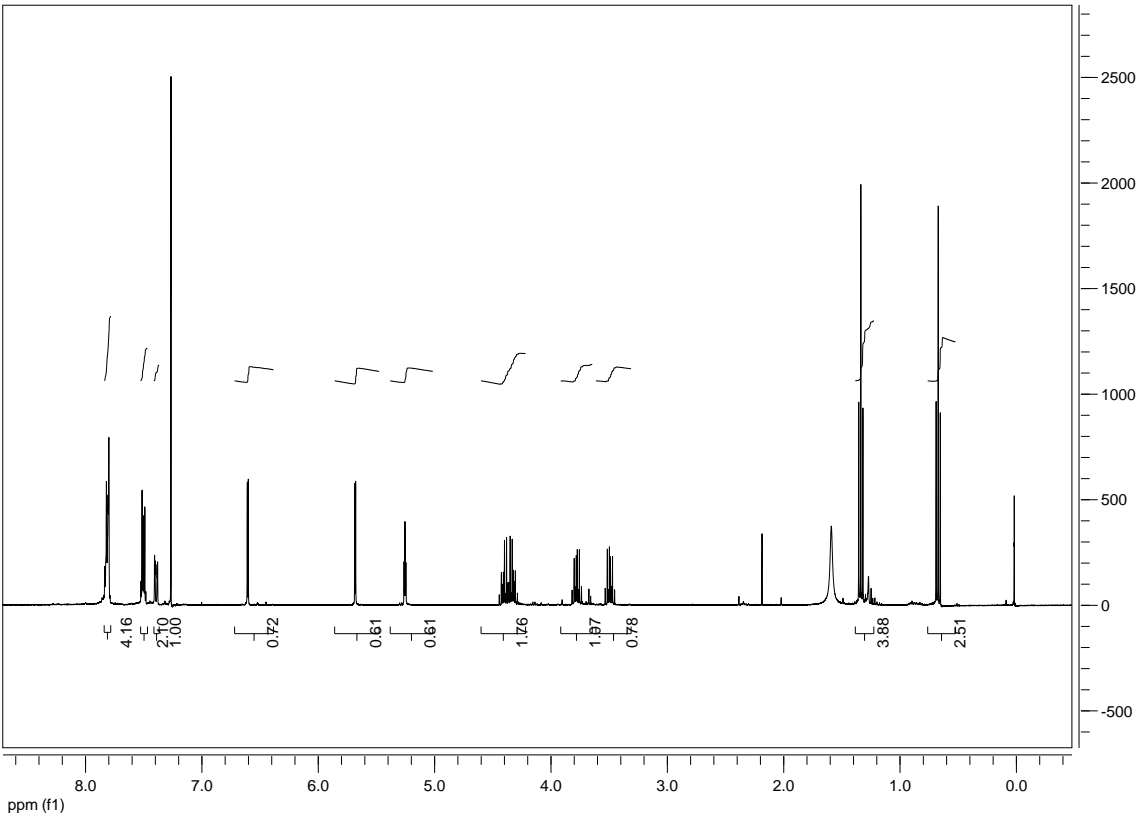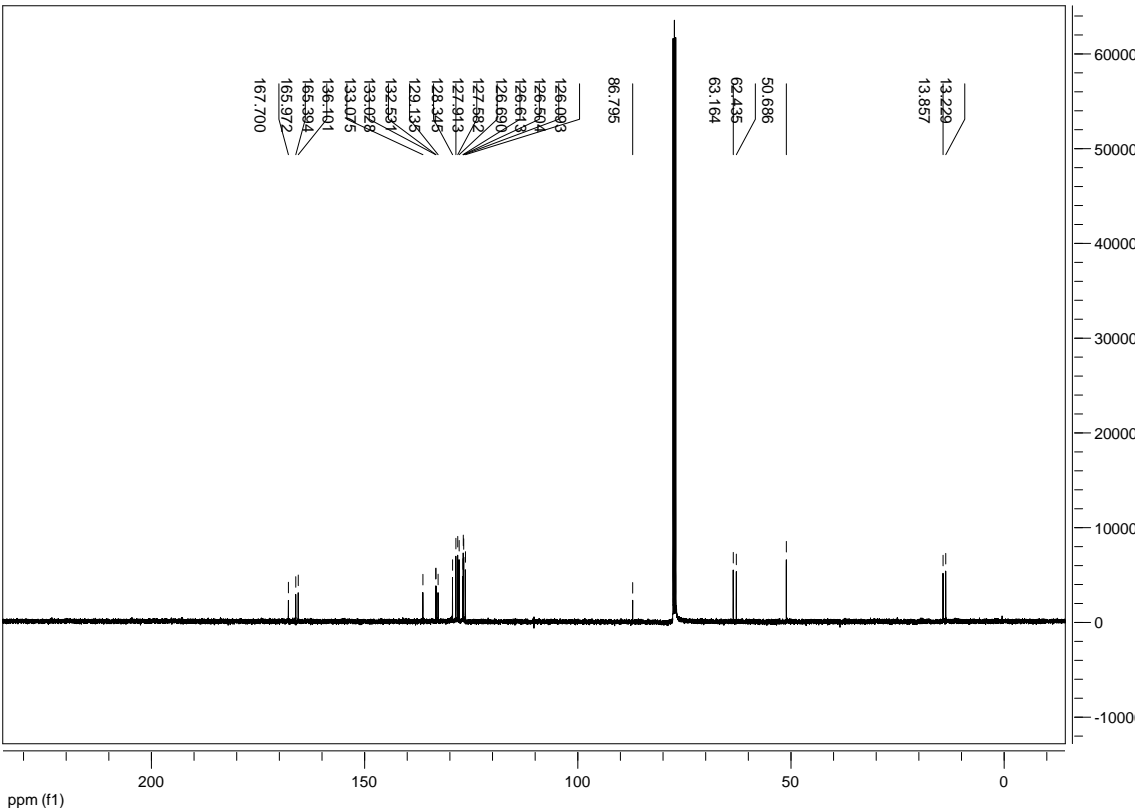

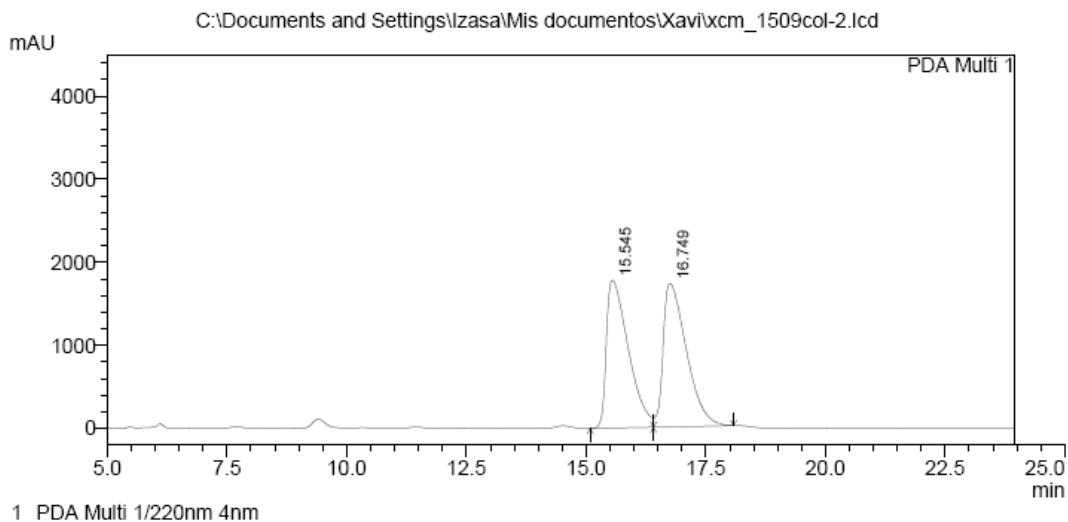

PeakTable

| Peak# | Ret. Time | Area      | Height  | Area %  | Height % |
|-------|-----------|-----------|---------|---------|----------|
| 1     | 15.545    | 56405260  | 1777742 | 49.196  | 50.766   |
| 2     | 16.749    | 58249541  | 1724128 | 50.804  | 49.234   |
| Total |           | 114654802 | 3501870 | 100.000 | 100.000  |

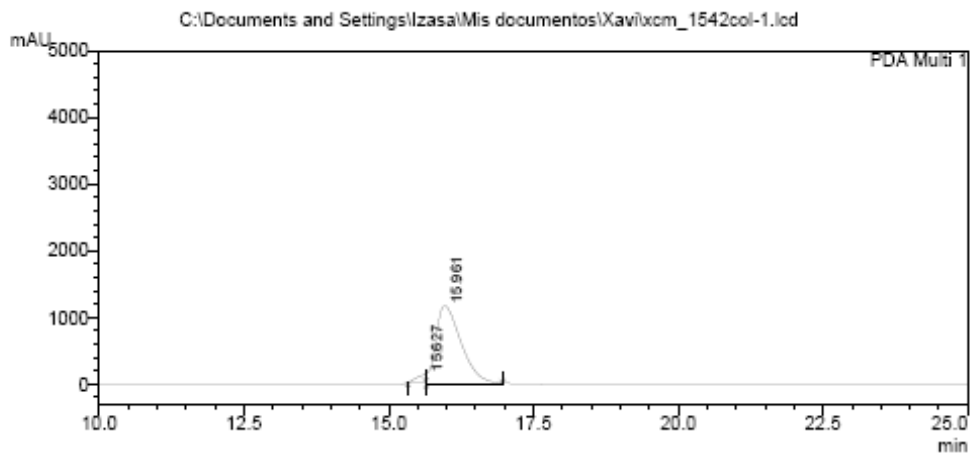

PeakTable

| Peak# | Ret. Time | Area     | Height  | Area %  | Height % |
|-------|-----------|----------|---------|---------|----------|
| 1     | 15.627    | 1335125  | 124346  | 3.597   | 9.580    |
| 2     | 15.961    | 35777622 | 1173564 | 96.403  | 90.420   |
| Total |           | 37112747 | 1297909 | 100.000 | 100.000  |

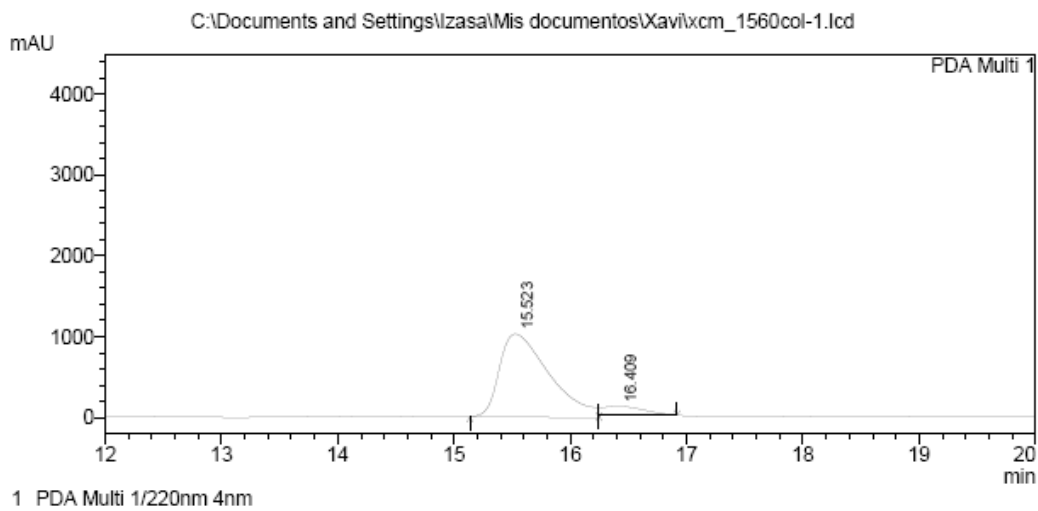

PeakTable

PDA Ch1 220nm 4nm

| Peak# | Ret. Time | Area     | Height  | Area %  | Height % |
|-------|-----------|----------|---------|---------|----------|
| 1     | 15.523    | 30687003 | 1029076 | 91.484  | 90.088   |
| 2     | 16.409    | 2856539  | 113223  | 8.516   | 9.912    |
| Total |           | 33543542 | 1142299 | 100.000 | 100.000  |

**diethyl 3-(4-chlorophenyl)-4-methylene-5-oxodihydrofuran-2,2(3H)-dicarboxylate**

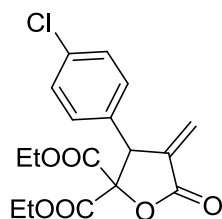

$^1\text{H}$  NMR (400 MHz,  $\text{CDCl}_3$ )  $\delta$  7.34–7.25 (m, 4H), 6.56 (d,  $J=3.3\text{Hz}$ , 1H), 5.62 (d,  $J=2.9\text{Hz}$ , 1H), 5.04 (t,  $J=3.0\text{Hz}$ , 1H), 4.45–4.25 (m, 2H), 3.94–3.85 (m, 1H), 3.71–3.63 (m, 1H), 1.31 (t,  $J=7.0\text{Hz}$ , 3H), 0.90 (t,  $J=7.2\text{Hz}$ , 3H).

$^{13}\text{C}$  NMR (100 MHz,  $\text{CDCl}_3$ )  $\delta$  167.4, 165.8, 165.3, 135.6, 134.6, 133.6, 131.0, 128.8, 126.0, 86.5, 63.2, 62.6, 49.9, 13.8, 13.4.

HRMS (ESI) calcd. for  $\text{C}_{17}\text{H}_{18}\text{ClO}_6$  ( $\text{M}+\text{H}$ ) $^+$  353.0786, found 353.0783.

Enantiomeric excess: 86% ( $\beta$ -ICPN) / -92% ( $(\text{DHQD})_2\text{PHAL}$ ) determined by HPLC (Daicel Chiralpak IC,

i-PrOH/Hexane=20/80), UV 220 nm, flow rate 1 mL/min,  $t_R$ = 22.1min 38.6 min.

$[\alpha]_D^{25} = +36$  ( $c=0.8$ ,  $\text{CHCl}_3$ , 86% ee)

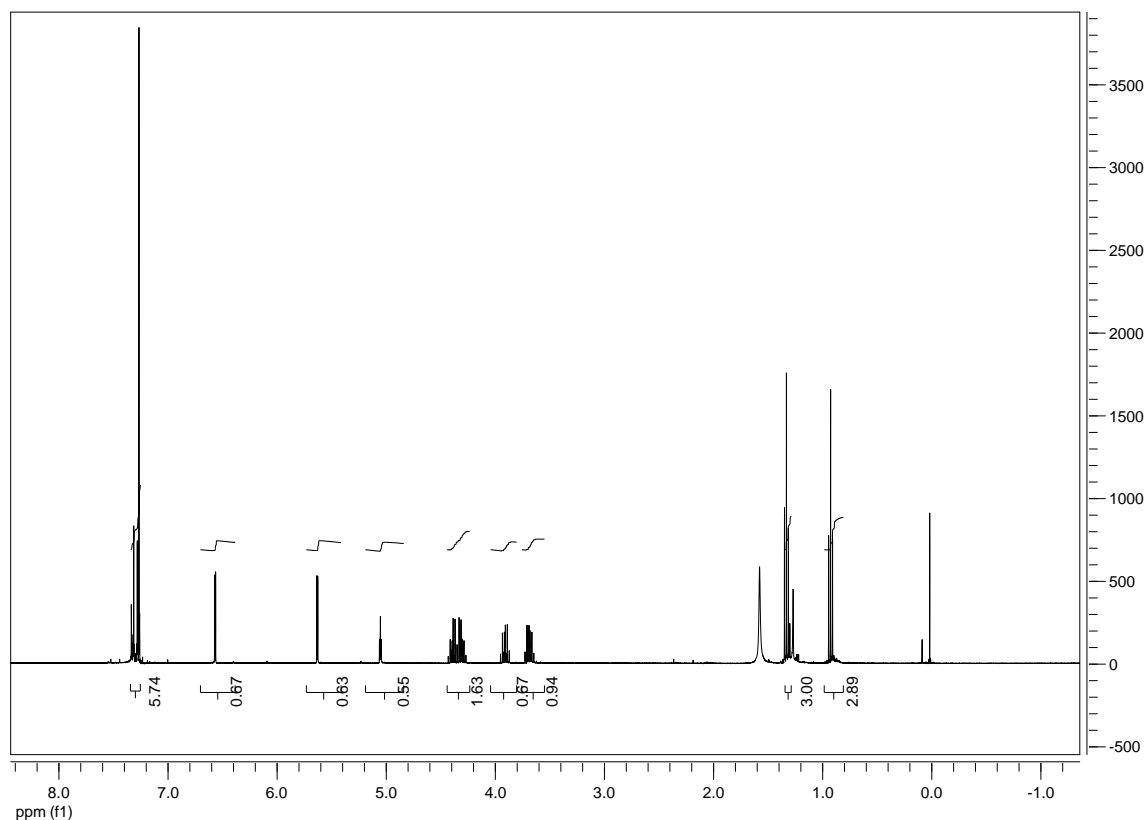

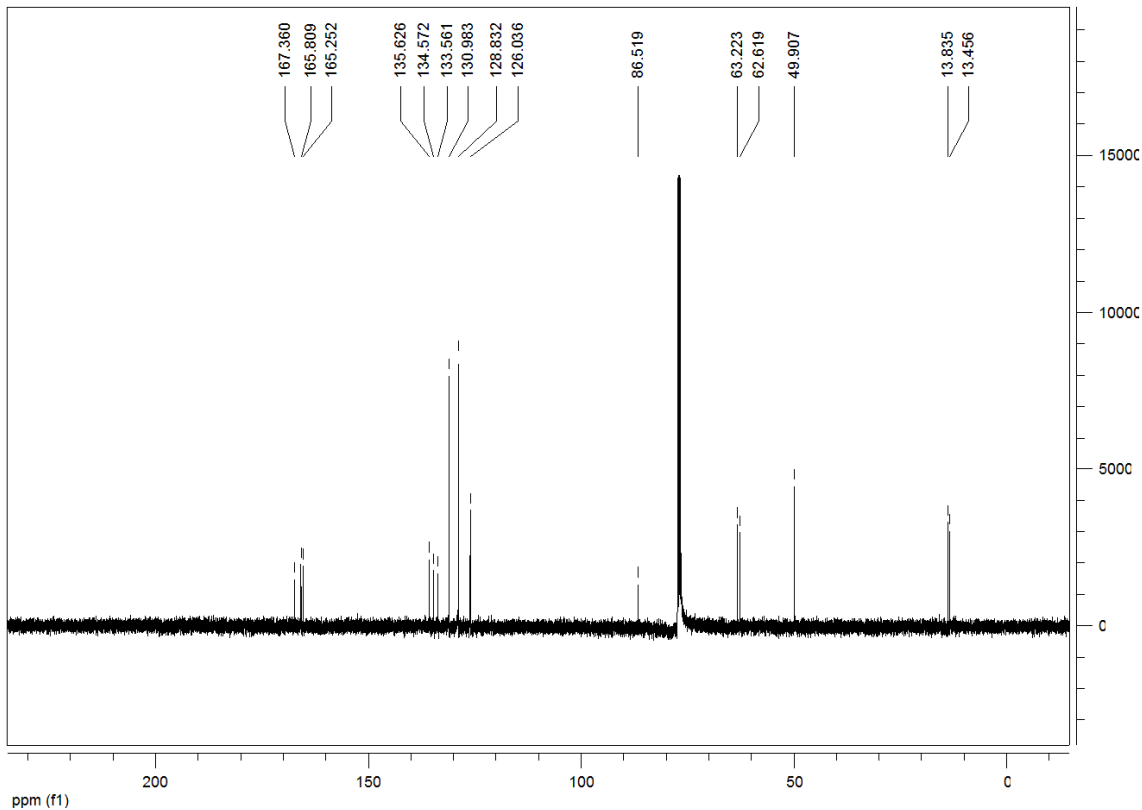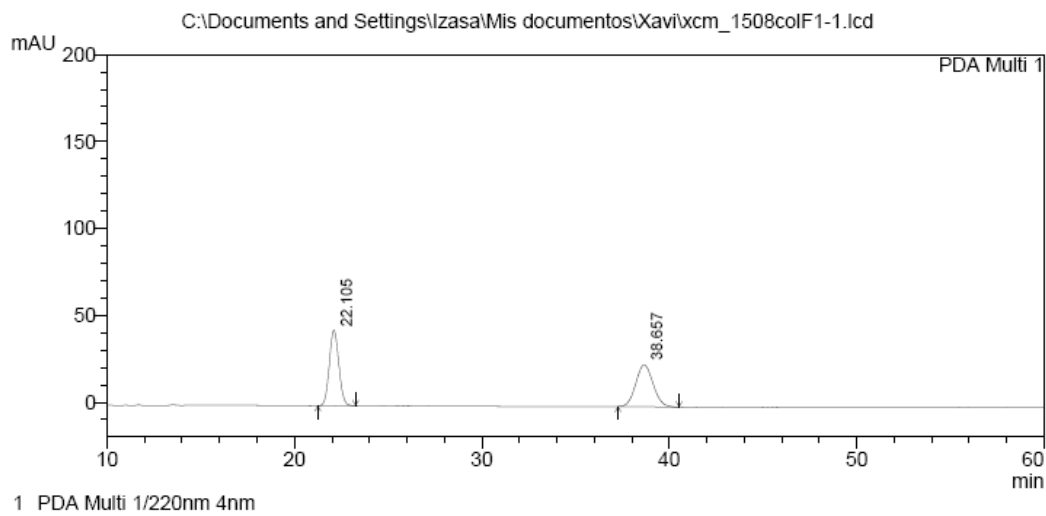

PeakTable

| PDA Ch1 220nm 4nm |           |         |        |         |          |
|-------------------|-----------|---------|--------|---------|----------|
| Peak#             | Ret. Time | Area    | Height | Area %  | Height % |
| 1                 | 22.105    | 1532716 | 43358  | 49.829  | 64.362   |
| 2                 | 38.657    | 1543249 | 24008  | 50.171  | 35.638   |
| Total             |           | 3075966 | 67366  | 100.000 | 100.000  |

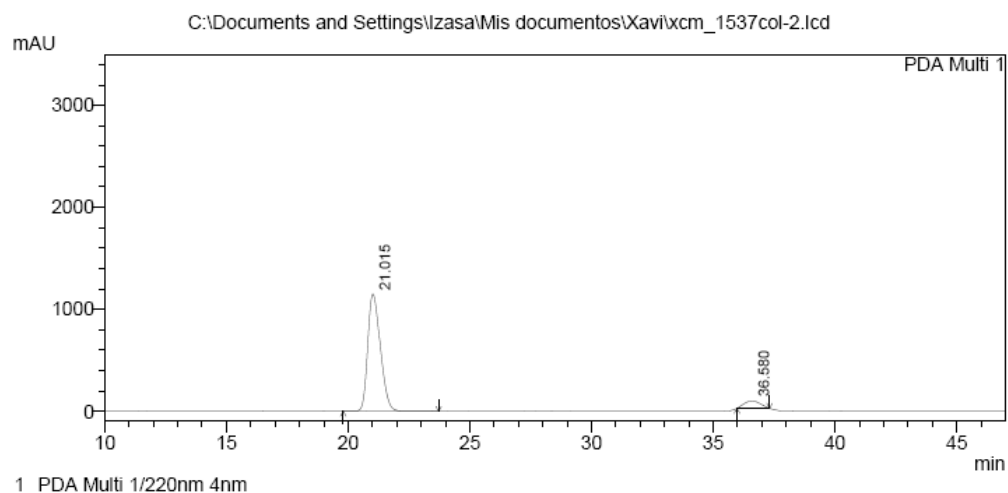

PeakTable

| Peak# | Ret. Time | Area     | Height  | Area %  | Height % |
|-------|-----------|----------|---------|---------|----------|
| 1     | 21.015    | 41558288 | 1148728 | 92.578  | 94.118   |
| 2     | 36.580    | 3331655  | 71785   | 7.422   | 5.882    |
| Total |           | 44889943 | 1220513 | 100.000 | 100.000  |

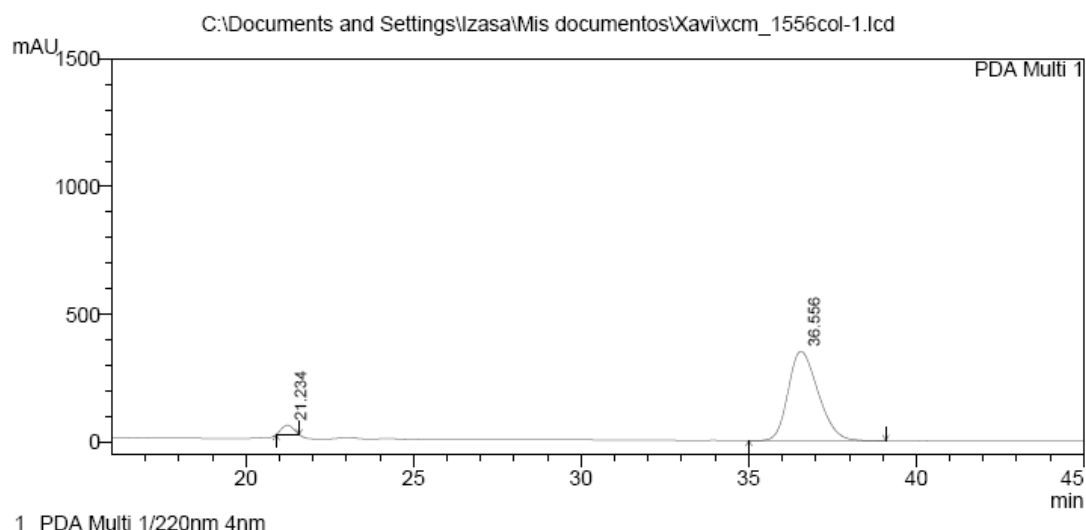

PeakTable

| Peak# | Ret. Time | Area     | Height | Area %  | Height % |
|-------|-----------|----------|--------|---------|----------|
| 1     | 21.234    | 867735   | 36074  | 3.868   | 9.372    |
| 2     | 36.556    | 21566727 | 348819 | 96.132  | 90.628   |
| Total |           | 22434462 | 384892 | 100.000 | 100.000  |



**diethyl 4-methyl-5-oxo-3-phenyldihydrofuran-2,2(3H)-dicarboxylate**

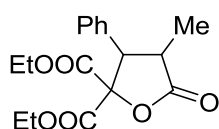

To a solution of compound **xx** (0.2 mmol) in EtOAc (2 mL) was added 10mol% Pd/C (0.1 equiv.). Hydrogenation was carried out under hydrogen atmosphere at room temperature and atmospheric pressure for 12h. After completion of the reaction (monitored by TLC), the reaction mixture was filtered through Celite and the filtrate was concentrated *in vacuo*. Purification of the residue by flash column chromatography (Hexane/EtOAc 3:1) afforded the desired reduced product (93% yield, >25:1 d.r.).

**<sup>1</sup>H NMR (400 MHz, CDCl<sub>3</sub>)** δ 7.30-7.24 (m, 3H), 7.12-7.06 (m, 2H), 4.39-4.18 (m, 3H), 3.88-3.80 (m, 2H), 3.31 (m, 1H), 1.31 (t, J=7.2Hz, 3H), 0.91 (d, J=7.4Hz, 3H), 0.83 (t, J=7.2Hz, 3H).

**<sup>13</sup>C NMR (100 MHz, CDCl<sub>3</sub>)** δ 187.2, 176.8, 166.3, 164.4, 134.1, 128.7, 128.6, 128.2, 87.4, 63.3, 62.1, 38.9, 13.8, 13.4, 10.6.

**HRMS (ESI)** calcd. for C<sub>17</sub>H<sub>21</sub>O<sub>6</sub> (M+H)<sup>+</sup> 321.1333, found 321.1341.

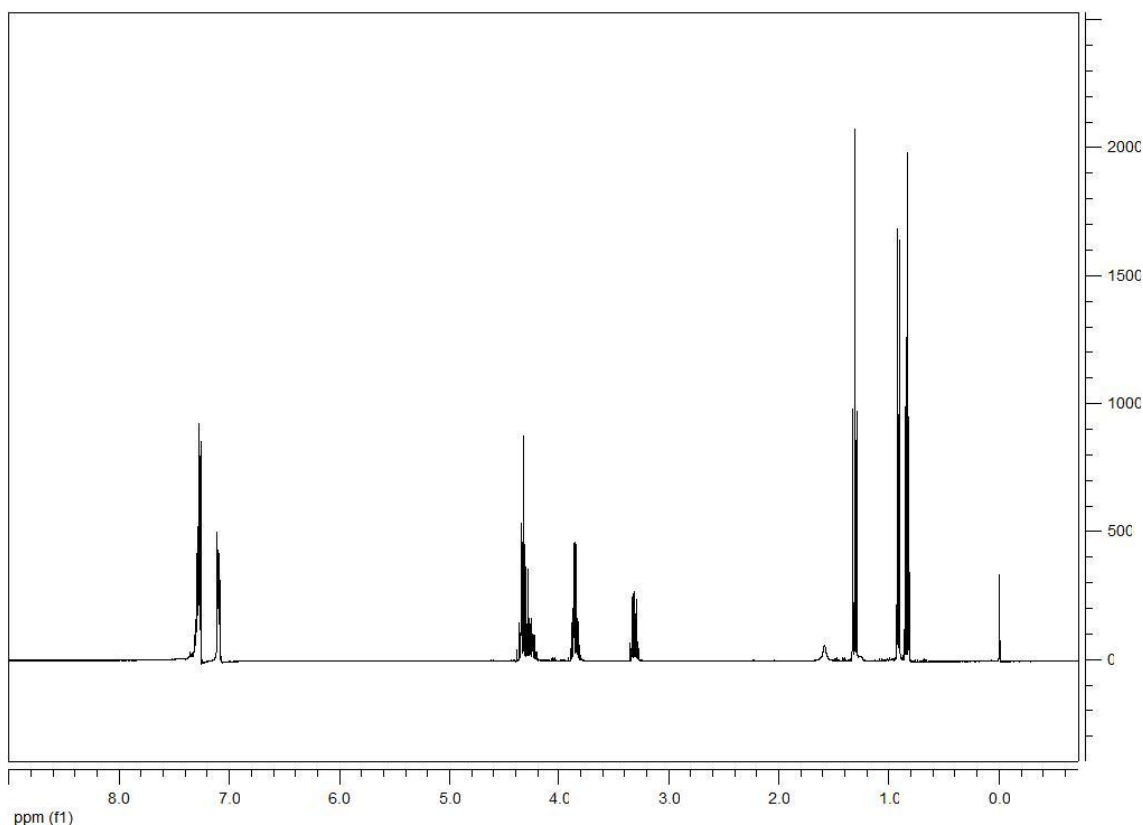

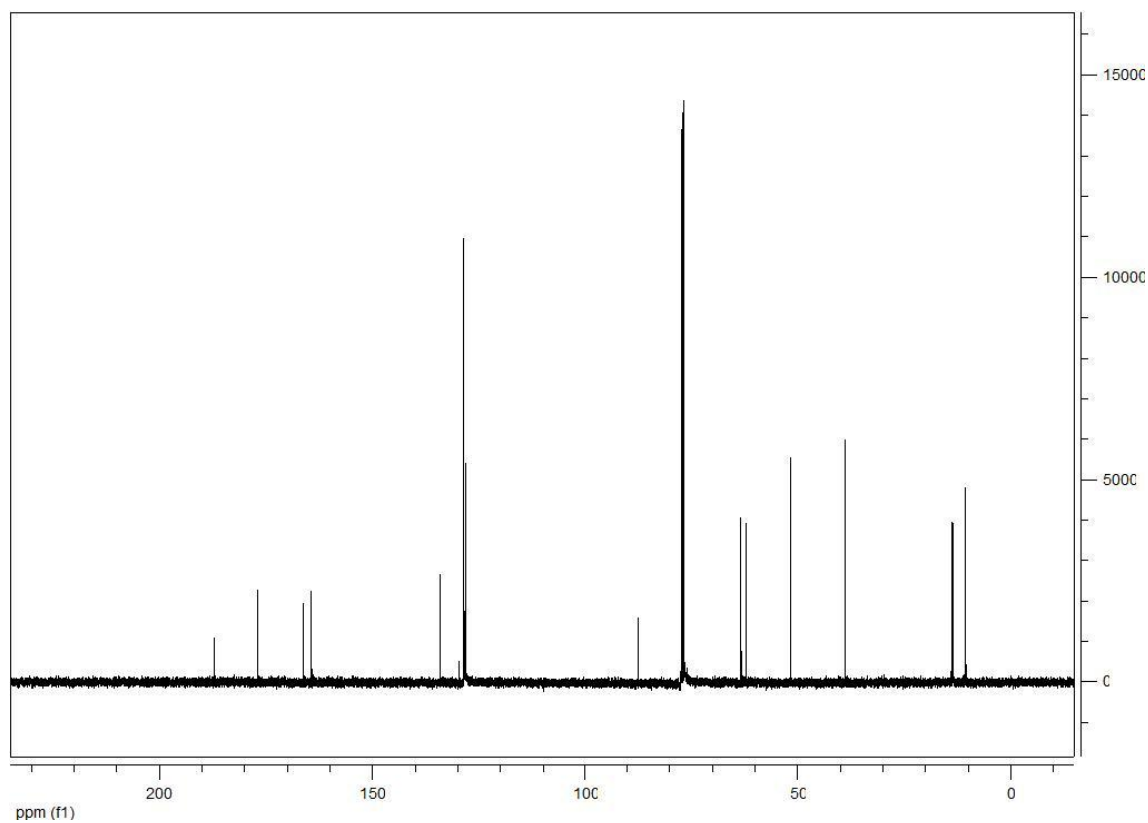

**diethyl 2'-oxo-4'-phenyl-2'H-spiro[bicyclo[2.2.1]hept[5]ene-2,3'-furan]-5',5' (4'H)-dicarboxylate**

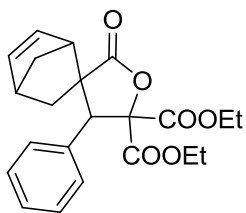

A solution of 50 mg of compound X (0.16 mmol, 1 equiv.) and 100 mg of freshly distilled cyclopentadiene (1.6 mmol, 10 equiv.) in 5 mL of toluene was refluxed overnight. Then, the organic solvent was evaporated and the crude product was directly purified by flash column chromatography (Hexane: EtOAc 3:1) to afford the desired product (91% of yield, >25:1 *dr*).

**<sup>1</sup>H NMR (400 MHz, CDCl<sub>3</sub>)** δ 7.24-7.17 (m, 3H), 7.01-6.94 (m, 2H), 6.37-6.28 (m, 2H), 4.46-4.29 (m, 2H), 4.02 (s, 1H), 3.74 (q, J=7.1Hz, 2H), 2.87-2.81 (bs, 2H), 2.06 (dd, J<sub>1</sub>=12.3Hz, J<sub>2</sub>=3.7Hz, 1H), 1.99 (d, J=9.1Hz, 1H), 1.43-1.39 (m, 1H), 1.36 (t, J=7.3Hz, 3H), 0.79 (t, J=7.0Hz, 3H), 0.72 (dd, J<sub>1</sub>=12.5Hz, J<sub>2</sub>=3.3Hz, 1H).

**<sup>13</sup>C NMR (100 MHz, CDCl<sub>3</sub>)** δ 187.1, 179.4, 167.0, 164.6, 137.2, 141.0, 133.8, 128.4, 127.8, 87.4, 63.3, 62.2, 55.7, 55.1, 51.9, 46.3, 42.4, 36.5, 13.9, 13.3.

**HRMS (ESI)** calcd. for C<sub>22</sub>H<sub>28</sub>NO<sub>6</sub> (M+NH<sub>4</sub>)<sup>+</sup> 402.1911, found 402.1916.

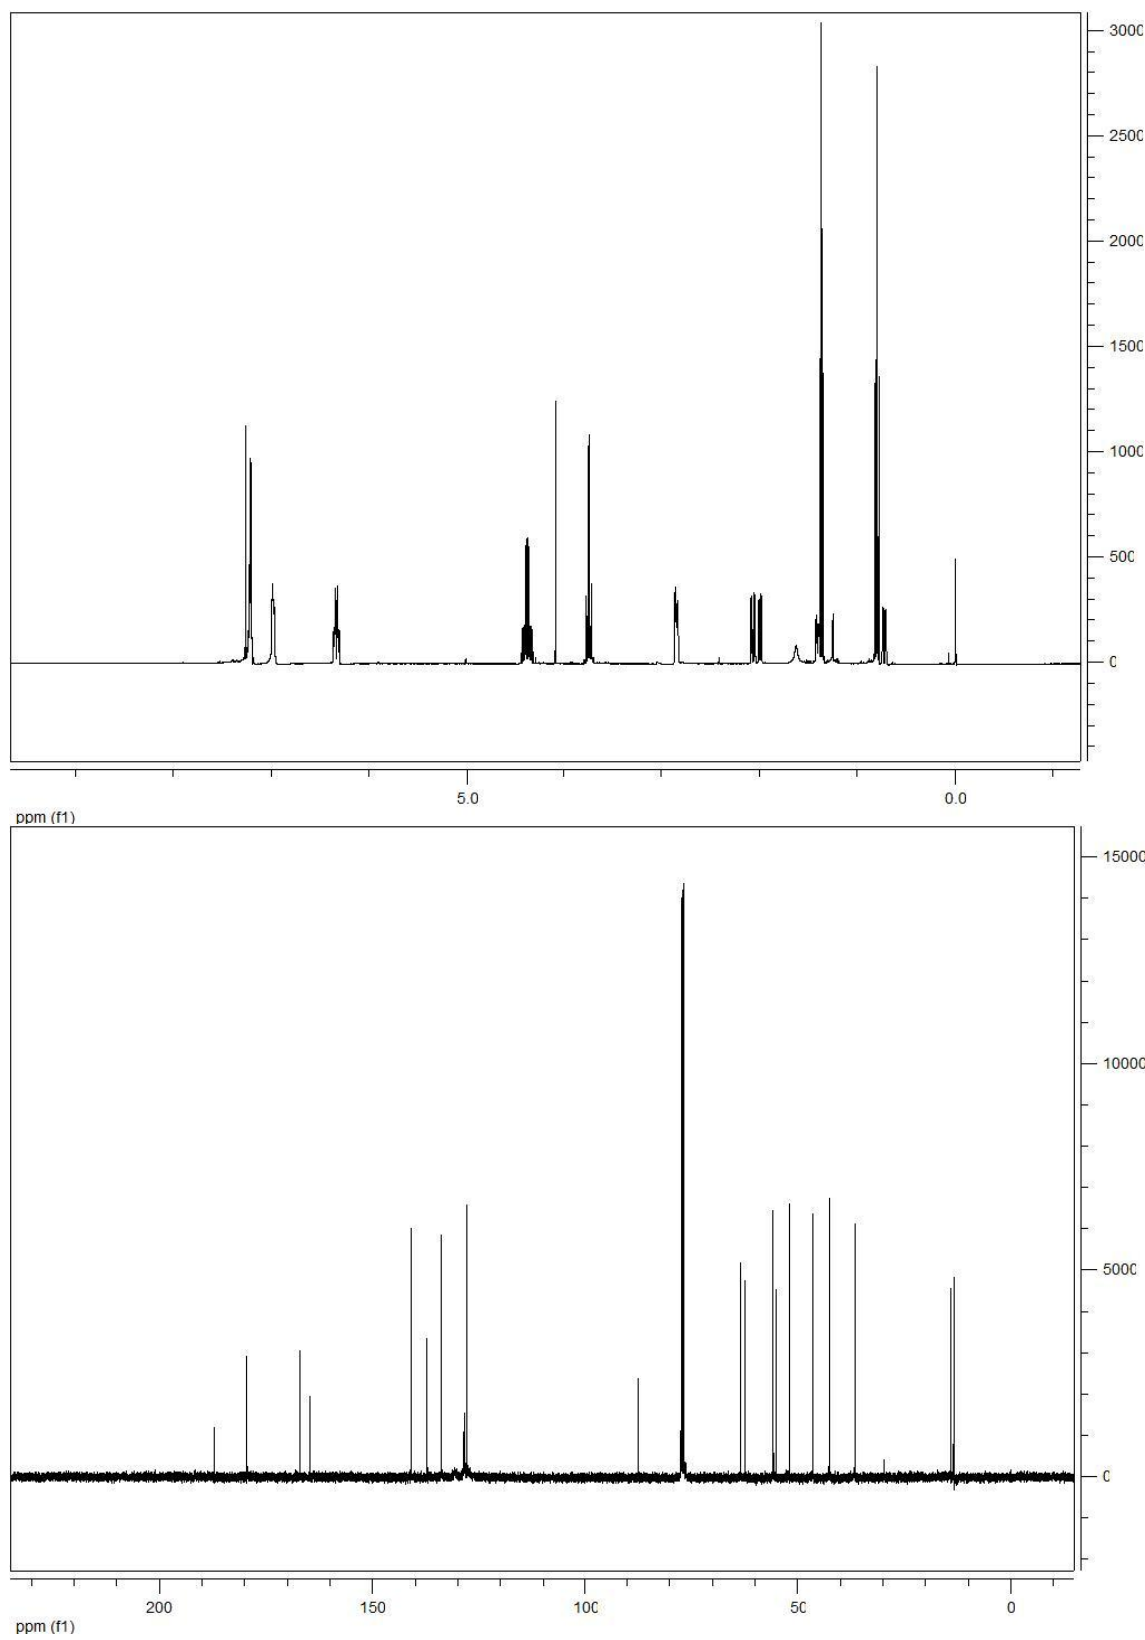

## Conformational analysis and absolute configuration determination of **4b**

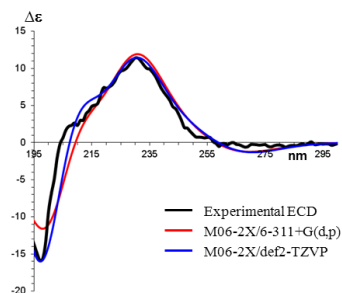

**Figure 1.** Simulations of the ECD spectrum of **4b** (red and blue traces). The experimental spectrum (black trace) was obtained of acetonitrile solution ( $1.0 \cdot 10^{-4}$  M, 0.2 cm path length).  $\Delta\epsilon$  are expressed in  $\text{Mol L}^{-1} \text{cm}^{-1}$ .

All the attempts to obtain good crystals of the prepared compounds were not successful. Moreover, with the exception of **3b**, a suitable heavy atom ( $Z > \text{Si}$  using standard Mo- $K\alpha$  radiation<sup>1</sup>) was not available for the assignment of the absolute configuration by the anomalous dispersion X-ray method.<sup>2</sup> For this reason the configuration was determined by a combination of conformational analysis and theoretical simulations of chiro-optical spectra. Compound **4b** was selected as representative compound.

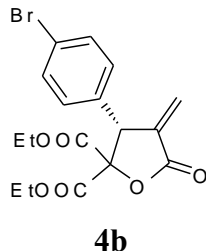

The determination of the absolute configuration (AC) of chiral molecules using chiroptical techniques like optical rotation (OR), electronic circular dichroism (ECD), and vibrational circular dichroism (VCD) has gained feasibility and reliability because of the development of methods for the prediction of these properties based on density functional theory (DFT) and on its Time-Dependent formalism (TD-DFT).<sup>3</sup> In the present case the theoretical calculation of the electronic circular dichroism spectra (ECD) was selected for the absolute configuration assignment. Although the rigidity of

<sup>1</sup> Hooft, R. W. W.; Stravera, L. H.; Spek, A. L. *J. Appl. Cryst.*, **2008**, *41*, 96–103

<sup>2</sup> Bijvoet, J. M.; Peerdeman, A.F.; Van Bommel, A.J. *Nature*, **1951**, *168*, 271.

<sup>3</sup> For reviews see: a) Bringmann, G.; Bruhn, T.; Maksimenka, K.; Hemberger, Y. *Eur. J. Org. Chem.* **2009**, 2717–2727. b) Crawford, T.D.; Tam, M.C.; Abrams, M.L. *J. Chem. Phys. A* **2007**, *111*, 12057–12068. c) Pescitelli, G.; Di Bari, L.; Berova, N. *Chem. Soc. Rev.* **2011**, *40*, 4603–4625. d) Mazzanti, A.; Casarini, D. *WIREs Comput. Mol. Sci.* **2012**, *2*, 613–641

the lactone core of **4b** helps in the reduction of the number of conformations to be considered,<sup>4</sup> the conformational freedom of the carboxyethyl moieties represent a challenging issue for the conformational analysis step. A survey on the conformational preferences of this fragment of the molecule was performed using the CSD database.<sup>5</sup> The analysis of two similar structures<sup>6</sup> showed that the terminal methyl groups adopts either anti or *gauche* relationship with the carbonyl group and the preferred relative disposition is largely variable depending on the remaining geometry of the molecule. Being the ethyl groups a non-chromophoric part of **4b**, their contribution to the ECD spectrum can be considered marginal. For this reason the two ethyl groups were substituted by two methyl groups to reduce the conformational space to be explored. The following discussion refers to the model compound **4b<sub>Me</sub>**.

A full conformational search was performed by Molecular Mechanics (Monte Carlo searching together with the MMFF94 molecular mechanics force field<sup>7</sup>). After the elimination of duplicate or enantiomeric structures, the remaining conformers were then optimized using DFT at the B3LYP/6-311+G(d,p) level<sup>8</sup>. To confirm their stability and to evaluate the free energy of each conformation the harmonic vibrational frequencies were calculated at the same level and no imaginary frequencies were observed. After DFT minimization, four conformations were found to be enclosed in a 3.5 kcal/mol window (conformation **a-d** as in Table S1). They exhibit the very same conformation of the lactone core, and they differ in the relative dispositions of the two carboxymethyl groups (Figure 1). The calculated energy differences suggest that only conformations **a** and **b** should be appreciably populated.

<sup>4</sup> Polavarapu, P.L.; Donahue, E.A.; Shanmugam, G.; Scalmani, G.; Hawkins, E.K.; Rizzo, C.; Ibnusaud, I.; Thomas, G.; Habel, D.; Sebastian, D. *J. Phys. Chem. A* **2011**, *115*, 5665–5673.

<sup>5</sup> CSD database rev 5.33, November 2011.

<sup>6</sup> A) Lu, J.-M.; Shi, M. *J. Org. Chem.* **2008**, *73*, 2206–2210. b) Kano, T.; Yamamoto, A.; Song, S.; Maruoka, K. *Chem. Commun.* **2012**, *47*, 4358–4360

<sup>7</sup> Titan 1.0.5, Wavefunction inc.

<sup>8</sup> Program Gaussian 09, rev A.02 M. J. Frisch, G. W. Trucks, H. B. Schlegel, G. E. Scuseria, M. A. Robb, J. R. Cheeseman, G. Scalmani, V. Barone, B. Mennucci, G. A. Petersson, H. Nakatsuji, M. Caricato, X. Li, H. P. Hratchian, A. F. Izmaylov, J. Bloino, G. Zheng, J. L. Sonnenberg, M. Hada, M. Ehara, K. Toyota, R. Fukuda, J. Hasegawa, M. Ishida, T. Nakajima, Y. Honda, O. Kitao, H. Nakai, T. Vreven, J. A. Montgomery, Jr., J. E. Peralta, F. Ogliaro, M. Bearpark, J. J. Heyd, E. Brothers, K. N. Kudin, V. N. Staroverov, R. Kobayashi, J. Normand, K. Raghavachari, A. Rendell, J. C. Burant, S. S. Iyengar, J. Tomasi, M. Cossi, N. Rega, J. M. Millam, M. Klene, J. E. Knox, J. B. Cross, V. Bakken, C. Adamo, J. Jaramillo, R. Gomperts, R. E. Stratmann, O. Yazyev, A. J. Austin, R. Cammi, C. Pomelli, J. W. Ochterski, R. L. Martin, K. Morokuma, V. G. Zakrzewski, G. A. Voth, P. Salvador, J. J. Dannenberg, S. Dapprich, A. D. Daniels, Ö. Farkas, J. B. Foresman, J. V. Ortiz, J. Cioslowski, and D. J. Fox, Gaussian, Inc., Wallingford CT, 2009.

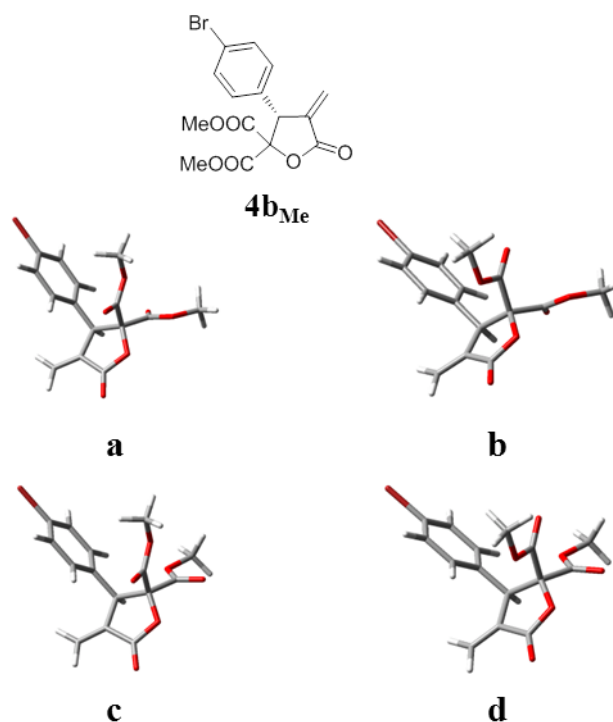

**Figure S1.** The four available conformations of **4b<sub>Me</sub>**. Geometry optimization at the B3LYP/6-311+G(d,p) level.

**Table S1.** Calculated energies for the four conformations of **4b<sub>Me</sub>** [B3LYP/6-311+G(d,p) level, in kcal/mol].

| Conformation | $\Delta E$ | $\Delta G^\circ$ | Pop %<br>( $\Delta G^\circ$ ) |
|--------------|------------|------------------|-------------------------------|
| <b>a</b>     | 0.00       | 0.00             | 58                            |
| <b>b</b>     | 0.61       | 0.22             | 40                            |
| <b>c</b>     | 2.88       | 2.18             | 1.5                           |
| <b>d</b>     | 3.50       | 2.98             | 0.5                           |

The electronic excitation energies and rotational strengths have been calculated for the *R* enantiomer as isolated molecule in the gas phase using TD-DFT with four different methods (functionals) and two different basis sets, to monitor if different theoretical levels of calculation provide different shapes of the simulated spectra.<sup>9</sup> Simulations were performed with the hybrid functionals BH&HLYP<sup>10</sup> and M06-2X,<sup>11</sup> the long-range correlated LC- $\omega$ B97XD that includes empirical dispersion,<sup>12</sup> and CAM-

<sup>9</sup> Check, C.E.; Gilbert, T.M. *J.Org.Chem.* **2005**, 70, 9828-9834

<sup>10</sup> In Gaussian 09 the BH&HLYP functional has the form:  $0.5 \cdot E_X^{HF} + 0.5 \cdot E_X^{LSDA} + 0.5 \cdot \Delta E_X^{Becke88} + E_C^{LYP}$

<sup>11</sup> Zhao, Y.; Truhlar, D.G. *Theor. Chem. Acc.* **2008**, 120, 215-241.

<sup>12</sup> Chai, J-D.; Head-Gordon, M. *Phys. Chem. Chem. Phys.*, **2008**, 10, 6615-6620.

B3LYP that includes long range correction using the Coulomb Attenuating Method.<sup>13</sup> The calculations employed either the 6-311++G(2d,p) or the def2-TZVP<sup>14</sup> basis sets, that proved to be accurate at a reasonable computational cost.<sup>1516</sup> Rotational strengths were calculated in both length and velocity representation, the resulting values being very similar (RMS differences < 5%). For this reason the errors due to basis set incompleteness should be very small, or negligible.<sup>17</sup>

As shown in Figure S2, the simulated spectra are similar on varying either the functional or the basis set. This implies that different populations of the conformers does not heavily influence the averaged spectrum. In addition to that, it is secured that any conformational modification caused by the presence of the ethyl group in **4b** do not influence the simulated spectra. All the calculations were performed supposing the *R* Absolute Configuration of **4b<sub>Me</sub>**.

<sup>13</sup> Yanai, T.; Tew, D.; Handy, N. *Chem. Phys. Lett.* **2004**, 393, 51-57.

<sup>14</sup> Weigend, F.; Ahlrichs, R. *Phys. Chem. Chem. Phys.*, **2005**, 7, 3297-305

<sup>15</sup> a) Cera, G.; Chiarucci, M.; Mazzanti, A.; Mancinelli, M.; Bandini, M. *Org. Lett.* **2012**, 14, 1350-1353; b) Pesciaioli, F.; Righi, P.; Mazzanti, A.; Bartoli, G.; Bencivenni, G. *Chem. Eur. J.* **2011**, 17, 2482-2485; c) Duce, S.; Pesciaioli, F.; Gramigna, L.; Bernardi, L.; Mazzanti, A.; Ricci, A.; Bartoli, G.; Bencivenni, G. *Adv. Synt. Catal.* **2011**, 353, 860-864; d) Bernardi, L.; Comes-Franchini, M.; Fochi, M.; Leo, V.; Mazzanti, A.; Ricci, A. *Adv. Synt. Catal.* **2010**, 352, 3399-3406.

<sup>16</sup> Woźnica, M.; Butkiewicz, A.; Grzywacz, A.; Kowalska, P.; Masnyk, M.; Michalak, K.; Luboradzki, R.; Furche, F.; Kruse, H.; Grimme, S.; Frelek J. *J. Org. Chem.* **2011**, 76, 3306-3319

<sup>17</sup> Stephens, P.J.; McCann, D.M.; Devlin, F.J.; Cheeseman, J.R.; Frisch, M.J. *J. Am. Chem. Soc.* **2004**, 126, 7514-7521



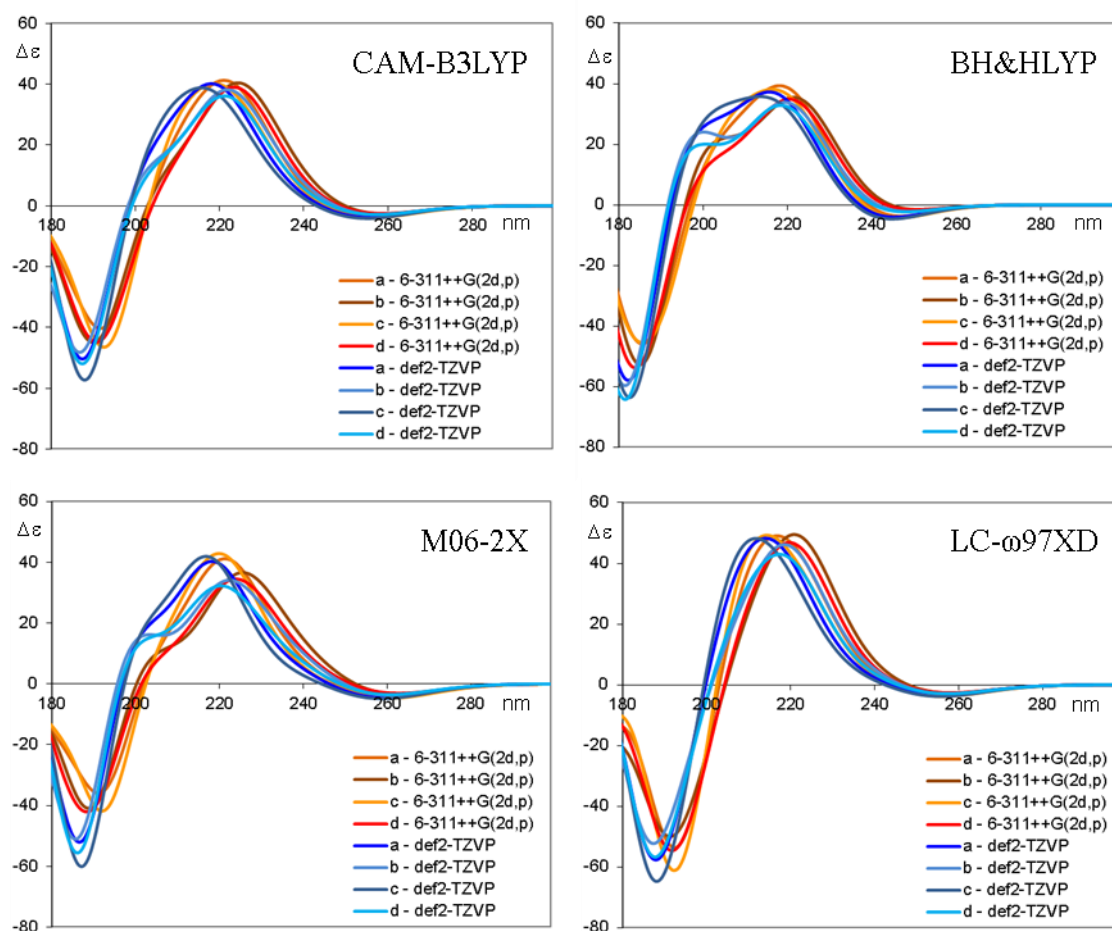

**Figure S2.** TD-DFT simulated spectra calculated for **4b<sub>Me</sub>** with the four different methods of calculation. Within the same box, the eight lines correspond to the spectra of the four conformations calculated with the two different basis sets [reddish lines: 6-311++G(2d,p). Bluish lines: def2-TZVP]. The spectra were generated as the sum of Gaussian lines (0.5 eV line width) centered on the calculated discrete transitions.

The conformationally averaged spectra were then obtained using a 58:40:1.5:0.5 ratio, corresponding to a Boltzmann distribution based on the ZPE-corrected free energies at +25°C (Figure S3).

The best simulation was obtained by the M06-2X/def2-TZVP combination, but all the simulated spectra consistently reproduce well the experimental one. The good agreement with the experimental spectrum also confirms that the initial assumption about the feasibility to replace the ethyl groups with two methyl groups was correct. The absolute configuration of **4b** could be thus reliably assigned as *R*.

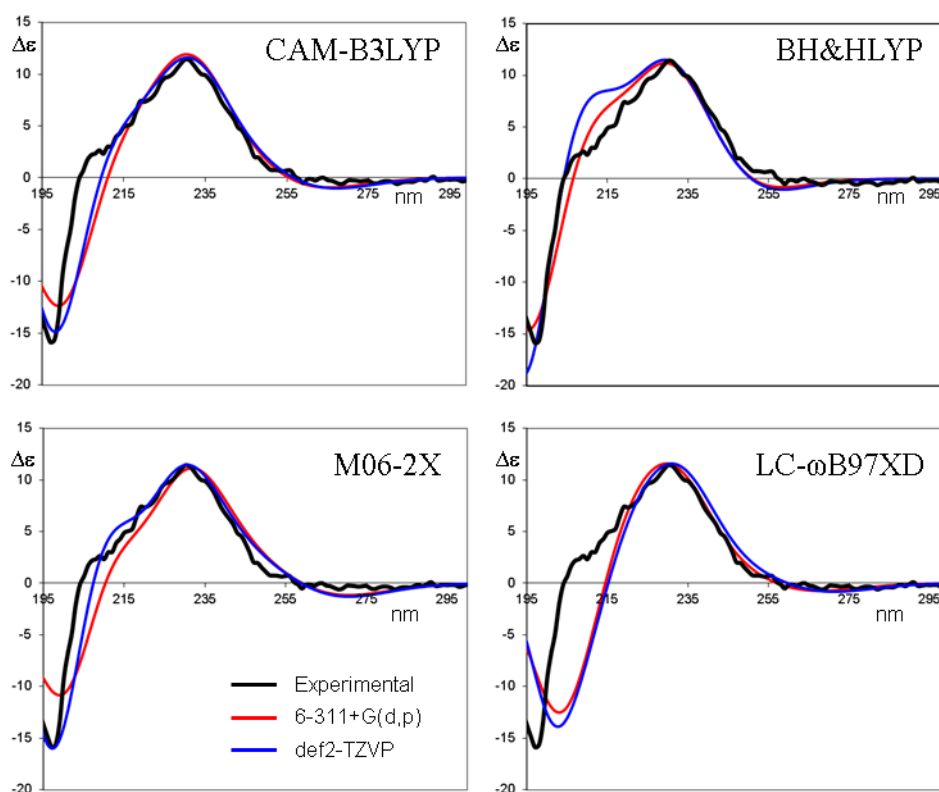

**Figure S3:** Simulations of the ECD spectrum of **4b**. Each simulated spectrum [calculated for **4b<sub>Me</sub>**. Red lines: 6-311+G(2d,p) basis set; blue lines: def2-TZVP basis set] was obtained starting from the spectra obtained for the four conformations weighted by Boltzmann distribution using free energies of table S1. The experimental spectrum of **4b** (black trace) was obtained of acetonitrile solutions ( $1.0 \times 10^{-4}$  M, 0.2 cm path length).  $\Delta\epsilon$  are expressed in  $\text{Mol L}^{-1} \text{cm}^{-1}$ . The simulated spectra were vertically scaled and red-shifted to match the experimental maximum at 229 nm (8-15 nm depending on the functional/basis set combination).
